# Supplementary material for: Experiences of digital communication with automated patient interviews and asynchronous chat in Swedish primary care: a qualitative study
Source: PubMed Central journal article supplement — BMJ Open. 2020 Jul 23;10(7):e036585. doi: 10.1136/bmjopen-2019-036585 (PMC7380727; doi:10.1136/bmjopen-2019-036585), 2020-07-23
Supplement: bmjopen-2019-036585.draft_revisions.pdf [file bmjopen-2019-036585.draft_revisions.pdf]

# BMJ Open

BMJ Open is committed to open peer review. As part of this commitment we make the peer review history of every article we publish publicly available.

When an article is published we post the peer reviewers' comments and the authors' responses online. We also post the versions of the paper that were used during peer review. These are the versions that the peer review comments apply to.

The versions of the paper that follow are the versions that were submitted during the peer review process. They are not the versions of record or the final published versions. They should not be cited or distributed as the published version of this manuscript.

BMJ Open is an open access journal and the full, final, typeset and author-corrected version of record of the manuscript is available on our site with no access controls, subscription charges or pay-per-view fees (<http://bmjopen.bmj.com>).

If you have any questions on BMJ Open's open peer review process please email [info.bmjopen@bmj.com](mailto:info.bmjopen@bmj.com)

# BMJ Open

## Digital Communication: The Newcomer in Family Medicine - GP and Nurse Experiences Working with Automated Patient Interviews and an Asynchronous Chat

|                               |                                                                                                                                                                                                                                                                                                                                     |
|-------------------------------|-------------------------------------------------------------------------------------------------------------------------------------------------------------------------------------------------------------------------------------------------------------------------------------------------------------------------------------|
| Journal:                      | <i>BMJ Open</i>                                                                                                                                                                                                                                                                                                                     |
| Manuscript ID                 | bmjopen-2019-036585                                                                                                                                                                                                                                                                                                                 |
| Article Type:                 | Original research                                                                                                                                                                                                                                                                                                                   |
| Date Submitted by the Author: | 24-Dec-2019                                                                                                                                                                                                                                                                                                                         |
| Complete List of Authors:     | Entezarjou, Artin; Lund University, Department of Clinical Sciences Malmö<br>Bolmsjö, Beata; Lund University, Department of Clinical Sciences in Malmö/Family Medicine<br>Calling, Susanna; Lunds Universitet,<br>Midlöv, Patrik ; Lund University, Clinical Sciences Malmo<br>Nymberg, Veronica ; Lund University, Family Medicine |
| Keywords:                     | Telemedicine < BIOTECHNOLOGY & BIOINFORMATICS, PRIMARY CARE, Information technology < BIOTECHNOLOGY & BIOINFORMATICS, BIOTECHNOLOGY & BIOINFORMATICS, Organisation of health services < HEALTH SERVICES ADMINISTRATION & MANAGEMENT                                                                                                 |
|                               |                                                                                                                                                                                                                                                                                                                                     |

SCHOLARONE™  
Manuscripts

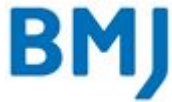

I, the Submitting Author has the right to grant and does grant on behalf of all authors of the Work (as defined in the below author licence), an exclusive licence and/or a non-exclusive licence for contributions from authors who are: i) UK Crown employees; ii) where BMJ has agreed a CC-BY licence shall apply, and/or iii) in accordance with the terms applicable for US Federal Government officers or employees acting as part of their official duties; on a worldwide, perpetual, irrevocable, royalty-free basis to BMJ Publishing Group Ltd ("BMJ") its licensees and where the relevant Journal is co-owned by BMJ to the co-owners of the Journal, to publish the Work in this journal and any other BMJ products and to exploit all rights, as set out in our [licence](#).

The Submitting Author accepts and understands that any supply made under these terms is made by BMJ to the Submitting Author unless you are acting as an employee on behalf of your employer or a postgraduate student of an affiliated institution which is paying any applicable article publishing charge ("APC") for Open Access articles. Where the Submitting Author wishes to make the Work available on an Open Access basis (and intends to pay the relevant APC), the terms of reuse of such Open Access shall be governed by a Creative Commons licence – details of these licences and which [Creative Commons](#) licence will apply to this Work are set out in our licence referred to above.

Other than as permitted in any relevant BMJ Author's Self Archiving Policies, I confirm this Work has not been accepted for publication elsewhere, is not being considered for publication elsewhere and does not duplicate material already published. I confirm all authors consent to publication of this Work and authorise the granting of this licence.

1  
2  
3 **Digital Communication: The Newcomer in Family Medicine -**  
4 **GP and Nurse Experiences Working with Automated Patient Interviews and an Asynchronous Chat**  
5

6 Artin Entezarjou<sup>1</sup>, Beata Borgström Bolmsjö<sup>1</sup>, Susanna Calling<sup>1</sup>, Patrik Midlöv<sup>1</sup>, Veronica Milos Nymberg<sup>1</sup>  
7

8 Lund University, Department of Clinical Sciences in Malmö/Family Medicine, Center for Primary Health  
9 Care Research, Box 50332, 20213 Malmö, Sweden  
10

11  
12  
13 **Corresponding author:**

14 Artin Entezarjou, [artin.entezarjou@med.lu.se](mailto:artin.entezarjou@med.lu.se), +46723013113

15 Lund University

16 Department of Clinical Sciences in Malmö/Family Medicine

17 Center for Primary Health Care Research

18 Box 50332

19 202 13 Malmö

20 Sweden  
21  
22  
23

24  
25  
26  
27 **Word count** excluding title page, abstract, tables, acknowledgements, contributions & references: 3997  
28

29 **Key words:** Telemedicine, Primary Care, Information Technology, Medical Staff, Attitude of Health  
30 Personnel  
31  
32  
33  
34  
35  
36  
37  
38  
39  
40  
41  
42  
43  
44  
45  
46  
47  
48  
49  
50  
51  
52  
53  
54  
55  
56  
57  
58  
59  
60

## ABSTRACT

**Objectives:** To explore staff experiences of working with a digital communication platform implemented throughout several primary health care centers (PHCCs) in Sweden.

**Design:** A descriptive qualitative approach using focus group interviews. Qualitative content analysis was used to code, categorize, and finally abstract data into one comprehensive theme.

**Setting:** Three PHCCs across Sweden, in both rural and urban settings.

**Participants:** Mixed groups of primary care physicians and nurses.

**Results:** Six categories emerged: “Fears and Benefits of Digital Communication”, “Altered Practice Workflow”, “Accepting the Digital Society”, “Safe and Secure for Patients”, “Doesn't Suit Everyone and Everything”, and “An Incomplete System”. These were abstracted into one comprehensive theme: “Digital Communication: The Newcomer in Family Medicine”.

**Conclusions:** Family medicine staff were ambivalent concerning the use of digital communication but, after a period of adjustment, it became a useful communication tool especially when combined with continuity of care. Staff acknowledged limitations with regard to use by inappropriate patient populations, information overload and misinterpretation of text by both staff and patients.

Abstract word count: 165

## STRENGTHS AND LIMITATIONS OF THIS STUDY

- This is the first study exploring both physician and nurse experiences of digital communication in the primary care setting.
- Theoretical saturation and high participant engagement allowed for thick descriptions and transferability of our findings to other contexts.
- Limitations include lack of multiple coders and a potential bias toward physician perspectives as the interviewers were both physicians.

## INTRODUCTION

The patient interview and physical examination are central to family medicine consultations. In Sweden, patients are increasingly using digital communication to access primary care.[1] However, limited evidence for e-health has been described as a problem.[2]

Heterogeneity between digital communication tools is high thus making it difficult to draw general conclusions about the usefulness of such tools. Some use synchronous video communication, while others provide an asynchronous “chat-based” tool. Automated patient interviewing software is also used to gather key information prior to consultations.

Swedish health care holds a high international standard,[3] but low continuity and poor accessibility to primary care contribute to low patient satisfaction.[4] Whether digital communication can address or aggravate these challenges is currently unknown. Little is known about staff experience working with such technology. Potential benefits may never be realized if staff experiences become a barrier to implementation.

A Norwegian study recently found that general practitioners (GPs) generally had positive experiences with using digital communication.[5] Meanwhile, UK studies found GPs felt such communication benefited patients and saved time, but also raised concerns about security, increased workloads, and poor integration into clinical practice.[6 7]

None of the above studies evaluated nurse perspectives. As nurses have a crucial role in primary care,[8] understanding their experiences of digital communication is crucial. Indeed, a Swedish study found nurses experienced increased workloads, a damaged patient-provider relationship and lack of user-support.[9]

Since September 2018 a digital communication platform (developed by Doctrin AB, referred to as ‘the platform’ in this paper) has been implemented across several primary health care centers (PHCCs) in Sweden as the first point of contact prior to booking physical visits. Patients access an automated patient interviewing software on their computer, tablet or smartphone and can freely write their ideas, concerns, and expectations as is common in family medicine consultations.[10] They then answer a query-specific questionnaire, with answers presented to the healthcare provider (usually a nurse), who can ask additional questions via asynchronous chat-based communication if needed. Queries can be forwarded to a GP or other staff if required.

This qualitative study aimed to explore family medicine staff experiences of working with the platform by answering the following research question:

*How do family medicine physicians and nurses experience the implementation and use of digital communication in the form of automated patient interviewing software and chat-based patient-provider communication?*

## METHODS

### Qualitative Approach and Research Paradigm

This study deemed an interpretivist paradigm suitable for exploring the phenomena of staff experience working with digital communication.[11] Such an approach is adopted by the qualitative content analysis methodology as presented by Graneheim and Lundman.[12] Focus group interviews, commonly used to study attitudes and needs of medical staff,[13] were thus chosen as the data-collection method. As the GPs and nurses form pre-existing groups working together as a team during the focus group interviews, it allows “naturalistic” exchanges during data collection. This may give a deeper understanding of the target phenomenon. Open discussions allow participants to debate the studied phenomenon from a personal point of view and facilitate expression of beliefs and attitudes left undeveloped in an individual deep interview.

### Context

Three voluntary PHCCs using the platform were chosen to provide a mix of urban and rural settings. For each PHCC, a focus group interview with an even distribution of GPs and nurses was planned, with the goal of recruiting a minimum of six participants per group.

### Ethical Considerations

The study was approved by the Swedish Ethical Review Authority (reference number 2019-01516). Each participant gave written consent to participate in the focus group interview.

### Patient and Public Involvement

Patients or the public were not involved in this study.

### Data Availability Statement

Interview transcripts and coding data is available upon request.

### Data Collection

Interviews were conducted between June 5<sup>th</sup> and June 12<sup>th</sup> 2019 with a moderator (VMN) introducing topics with open-ended interview-guide questions developed from the research question (appendix 1), facilitating the discussion with follow-up questions and summaries to verify interpretations. The interview guide was iteratively modified in response to evolving study findings. For data triangulation, an interview assistant (AE) observed and registered non-verbal communication but also aided the moderator in facilitating the discussion. Demographic data and quantitative data on months of experience working with the platform were also collected from all interview participants with a short questionnaire. Interviews were audio recorded (Olympus VN-8700PC digital voice recorder) and transcribed verbatim.

### Data Analysis

Analysis was conducted in Swedish in NVivo 12. Relevant quotes for this paper were translated into English. The first author (AE) read and re-read the transcripts while listening to the audio recording for transcript correction and data familiarization. Meaning units were identified, condensed, and coded by the first author. Examples of the coding process are given in table 1. Codes were grouped into manifest categories and sub-categories. Regular peer debriefing occurred with two other authors (VMN and BBB)

for discussion and reflection at all levels of analysis, discussing appropriateness of meaning units, coding, and categorization. Once consensus was reached regarding categories, all three authors involved in the analysis abstracted the categories to an overarching latent theme. The manuscript was drafted using SRQR reporting guidelines.[14]

Table 1: Examples of meaning units, condensed meaning units and codes

| Meaning unit                                                                                                              | Condensed Meaning Unit                             | Code                           |
|---------------------------------------------------------------------------------------------------------------------------|----------------------------------------------------|--------------------------------|
| "...if it has any medical consequences, it's too soon to tell, there's too few, a too small sample"                       | Too small sample to know medical consequences      | Medical consequences unknown   |
| "...and to be able to consult colleagues and the doctors and such... I see that as positive, compared to using the phone" | Easier to consult colleagues compared to the phone | Enables colleague consultation |

## RESULTS

### Study Unit Characteristics

We recruited a total of 9 GPs and 10 nurses across our three focus groups, with four to ten participants per group. Characteristics of PHCC participants are summarized in table 2.

Table 2: Staff and PHCC characteristics.

|               | Location | Patients managed | Number of Staff (as cited) | Age Group | Number of Females | Mean Years with License (range) | Mean Months in Platform (range) |
|---------------|----------|------------------|----------------------------|-----------|-------------------|---------------------------------|---------------------------------|
| <b>PHCC 1</b> | Urban    | 9 000            | 3 Nurses (Nurse 1-3)       | 20-50     | 3                 | 4.3 (3-5)                       | 2.7 (2-3)                       |
|               |          |                  | 1 GP (GP 1)                | 50-60     | 1                 | 18 (18-18)                      | 4 (4-4)                         |
| <b>PHCC 2</b> | Urban    | 27 000           | 2 Nurses (Nurse 4-5)       | 20-40     | 2                 | 6 (1-11)                        | 3 (3-3)                         |
|               |          |                  | 3 GPs (GP 2-4)             | 40-50     | 1                 | 10 (9-11)                       | 4 (1-6)                         |
| <b>PHCC 3</b> | Rural    | 8 000            | 5 Nurses (Nurse 6-10)      | 30-60     | 4                 | 17.4 (1-31)                     | 3.5 (2-4)                       |
|               |          |                  | 5 GPs (GP 5-9)             | 30-60     | 4                 | 15.2 (3-23)                     | 3.6 (3-4)                       |

During analysis, 43 subcategories emerged, grouped into six categories, abstracted into one comprehensive theme: "*Digital communication as a newcomer in family medicine*". Categories are illustrated in the hierarchy chart displayed in table 3. Below each category is described in detail, with subcategories embedded in the text in *italics*.



Table 3: Categories and subcategories.

| Category                                           | Subcategory                                                                 |
|----------------------------------------------------|-----------------------------------------------------------------------------|
| <b>Fears and Benefits of Digital Communication</b> | Ambivalence towards the benefits of digital communication                   |
|                                                    | Advantage in providing first-hand information                               |
|                                                    | Reduce human error                                                          |
|                                                    | Affect the patient-provider relationship                                    |
|                                                    | Comprehensive questionnaire but overly informative symptom report           |
|                                                    | Value through the asynchronous chat                                         |
|                                                    | Varying need to ask follow-up questions                                     |
|                                                    | Thoughts on visual communication                                            |
|                                                    | Loss of communication nuances                                               |
|                                                    | Misuse by patients                                                          |
| <b>Altered Practice Workflow</b>                   | Uncertainty regarding the future                                            |
|                                                    | Risks from difficulties assessing symptom severity                          |
|                                                    | Involuntary responsibility for irrelevant information                       |
|                                                    | Problems managing extended queries                                          |
|                                                    | Less stressful working environment compared to other forms of communication |
|                                                    | Automated repetitive routines                                               |
|                                                    | More focused queries                                                        |
|                                                    | Faster and easier patient communication                                     |
|                                                    | Nurses managed most queries                                                 |
|                                                    | Multiple parallel queries stressful                                         |
| <b>Accepting the Digital Society</b>               | Adapted routines over time                                                  |
|                                                    | Shorter digital visits                                                      |
|                                                    | Confusion due to many systems                                               |
|                                                    | Unpredictable patient volumes                                               |
|                                                    | Easier to consult colleagues and gather information before answering        |
|                                                    | Existing communication technology                                           |
|                                                    | Adaption is necessary                                                       |
| <b>Safe and Secure for the Patient</b>             | Worried before the start                                                    |
|                                                    | A desire to stay digital                                                    |
|                                                    | Perceived better over time                                                  |
|                                                    | Fast response times expected by patients                                    |
|                                                    | Better sorting of patient queries                                           |
|                                                    | Improved access                                                             |
|                                                    | Reduce infection risk                                                       |
|                                                    | Used by unexpected patient groups                                           |
|                                                    | A feeling of security among patients                                        |
|                                                    | Frequent visitors were managed better                                       |
| <b>Doesn't Suit Everyone and Everything</b>        | Improved continuity mattered                                                |
|                                                    | Doesn't suit all patients                                                   |
|                                                    | Not all queries felt suitable for digital communication                     |
| <b>An Incomplete System</b>                        | Digital communication as a partial solution                                 |
|                                                    | Adaption to local prerequisites                                             |
|                                                    | Missing features & technical limitations                                    |

### Fears and Benefits of Digital Communication

All groups expressed an *ambivalence towards the benefits of digital communication*, with some participants feeling curious and excited about using new technology, while others felt that the platform had many benefits but also many drawbacks.

Nurses from the two urban PHCCs found that the automated patient interview had an *advantage in providing first-hand information* from the patient, which they felt was thought-through, thus allowing patients to fully express their concerns without interruption.

---

*“And it’s really their words. It’s not our interpretation of their words. That’s also... it becomes more certain, I think.” – Nurse 3*

---

Questionnaires *reduced human error* as relevant questions were always asked, without individual stress or other externalities affecting the consultation. The ability to reflect over messages before sending them was perceived as beneficial managing overly emotional discussions. On the contrary, staff highlighted that some patients experience the chat as robotic, speculating that this could *affect the patient-provider relationship*.

Staff highlighted that the automated patient interview was a *comprehensive questionnaire but overly informative symptom report*. The presented information was perceived as useful, covering important differential diagnoses. However, staff experienced difficulties considering all of the provided information in the decision-making process. Many perceived that the *questionnaire determined the quality of medical history*. The most valuable information came from the first three free-text questions about patient ideas, concerns, and expectations.

---

*“...it’s about having just enough information in those questionnaires so that one can digest it... there is a balance... between too much and too little information too, so that it stays relevant...” – GP 2*

---

The platform was perceived to provide a unique *value through the asynchronous chat*, as it allowed for a unique means of communication distinct from traditional means.

---

*“One aspect is the automated patient interview tool and the other is the asynchronous communication. So those two things are new... I almost think that the asynchronous communication is the biggest benefit. I do.” – GP 4*

---

Staff experienced a *varying need to ask follow-up questions* via chat or telephone in cases where patients skipped a question or reported alarming symptoms. Staff generally felt comfortable with adjusting the level of communication between chat-based and telephone-based or booking a physical visit if needed.

1  
2  
3  
4 Several *thoughts on visual communication* also emerged. Sending images was perceived to be useful,  
5 providing a unique benefit over telephone consultations, especially for dermatological queries. The  
6 platform didn't include synchronous video consultations, but these were speculatively perceived as less  
7 beneficial, as the possibility to reflect over what was communicated wouldn't exist.

8 All groups felt that communicating via text led to some *loss of communication nuance*. While facial  
9 expressions and body language were already absent in telephone consultations, cues like tonality were  
10 further removed when moving to text-based communication. Staff felt that these cues, in certain  
11 situations, provided important "between the lines" context for interpretation of reported symptoms.  
12  
13

---

14  
15  
16 *"That's probably why... fully AI-run systems refer fifteen percent to the emergency*  
17 *department... Because if one interprets peoples' words literally, then the whole health*  
18 *care system crashes."* – GP 4  
19

---

20  
21 Patient interpretations of symptoms were perceived to not always be in-line with clinician  
22 interpretations. Misunderstood questions weren't reformulated by the automated patient interview as  
23 would otherwise be possible in a live conversation.  
24  
25

---

26  
27 *"What does 'dizziness' mean? ... There are many terms that mess things up. Because*  
28 *we're talking about different things, a certain symptom is one thing for the patient*  
29 *and another for me... so it's hard to just ask specific questions in a questionnaire like*  
30 *that."* – GP 2  
31  
32

---

33  
34 Staff from PHCC 2 also highlighted *risks from difficulties assessing symptom severity*. Most often, staff  
35 experienced symptoms to be less severe than reported when asking follow-up questions. GPs feared  
36 trivializing patient symptoms over time. Such risks were perceived lower with telephone consultations  
37 where severity was more confidently assessed. Consequently, some GPs expressed asking more follow-  
38 up questions via digital communication compared to telephone consultations.  
39  
40

---

41  
42 *"Yes, because I'm thinking if you look at the group presenting with anxiety and*  
43 *depression, for example, they get a lot of questions and then many of them*  
44 *specifically report suicidality or such, and... when one calls them, it isn't at all like they*  
45 *have written."* – Nurse 4  
46  
47

---

48  
49  
50 The human ability to scrutinize reported information when consulting patients was deemed as central to  
51 the consultation process, but the automated patient interview was perceived to lack this ability.  
52  
53  
54  
55  
56  
57  
58  
59  
60

---

“In a conversation... one consciously ignores some things... Here it’s ‘on print’... that they have ‘numbness in half of their body’... which looks a little worse than if they say it in a context where it is completely obvious that they don’t... The ‘human filter’, it vanishes.” – GP 4

---

Apart from inaccuracies in reported symptom severity, staff also experienced frustrations over *involuntary responsibility for irrelevant information*. Including obsolete chronic symptoms or symptoms indicative of potentially severe disease

---

“‘Do you have abdominal pain?’ Yes... they have had abdominal pain for fifty years. But we don’t need to talk about that today. I would never ask the question in a normal conversation... or an obvious tension headache, but... visual impairment, asymmetrical pupil size... like ‘Aha, maybe we should order an ambulance instead?!’” – GP 3

---

This resulted in divergent agendas between GPs and patients where GPs focused on addressing irrelevant but potentially urgent symptoms, while patients expect to get their primary less urgent concern addressed.

---

“...it’s not the questions I want the answer to, but which I have to assess... and it’s extremely annoying... and now there’s also a pop-up... saying that I am responsible for all the information I’m getting... Then I feel [the platform] limits me... that it takes longer than if I had done it another way.” – GP 3

---

All three PHCCs expressed challenges related to platform *misuse by patients*, including patients skipping questions, not reading staff responses, taking hours to answer follow-up questions, or failing to confirm suggested appointments.

PHCC 1 and PHCC 3 had relatively few patients using the platform, while PHCC 2 used the platform extensively. All participants expressed an *uncertainty regarding the future* of the platform, feeling it was too early to evaluate long-term risks and consequences of its use.

### **Altered Practice Workflow**

The platform was perceived to contribute to a *less stressful working environment compared to other forms of communication*, including prior digital communication systems and telephone consultations. Varying scheduling routines were implemented across PHCCs, adding variation to the workday. In some cases, certain rooms were dedicated to staff working with the platform, with staff appreciating a less noisy environment.

Initially *unpredictable patient volumes* and *confusion due to many systems* (medical record, the

platform, and other digital systems) were difficult for staff to manage, but they *adapted routines over time*.

---

*“First it was a bit easy to make mistakes...if one had maybe five ongoing queries and maybe two girls around the same age or so to speak, it was easy to write to the wrong patient. [...] until one develops a routine.” – Nurse 1*

---

Miscommunication prevention, adjusting staffing at other workstations, scheduling adjustments, and stress management strategies were examples of ongoing adjustments. Staff generally felt that they handled digital queries faster and better over time.

Generally, it seemed that *nurses managed most queries* in the platform. Staff from PHCC 2 estimating that around 30% of queries were forwarded to GPs for further evaluation. Nurses did, however, find *multiple parallel queries stressful*, especially when combined with physical visits and telephone consultations.

---

*“ One has to get used to it, sort of like working at the emergency department, where one has twenty patients at the same time, like, and each gradually gets finished, and some get finished quickly and other take a little longer” – Nurse 3*

---

All PHCCs experienced *faster and easier patient communication* in terms of appointment booking, information sharing and no longer having to redial patients not answering their phones. The chat-format made it *easier to consult colleagues and gather information before answering patient queries*.

Staff also experienced *automated repetitive routines*, including questions asked and documentation, copied and pasted into the medical record. Staff at PHCC 3 experienced *more focused queries*.

---

*“...visits are better prepared and that’s both good and bad. For example... someone seeking care for mental illness, who has already filled in rating scales etc., one enters the conversation at a different point. It’s not like, ‘Good day, what are you here for?’. Instead you have a lot of information before, when one starts the conversation... if it has any medical consequences is too soon to tell...” – GP 9*

---

Staff thus experienced *shorter digital visits*, especially for follow-ups, perceived to free up time for physical visits when needed. However, there were *problems managing extended queries* when patients took hours to respond. By the end of the day, potentially urgent symptoms may thus have been left unaddressed. PHCC 3 managed this with a standardized message, informing patients to seek out-of-hours clinics for urgent symptoms.

## Accepting the Digital Society

1  
2  
3 Some staff were *worried before the start* but there was a general perception that *adaption is necessary*,  
4 and digitalization wasn't perceived as a choice. Parallels were drawn to implementation of telephone  
5 communication in family medicine, and pressures to use existing means of communication.  
6  
7

---

8  
9 *"... if you have an entire panel who speaks English, then it's reasonable that we also*  
10 *speak English... we can't close our eyes to the fact that people communicate this way.*  
11 *We can't say 'we don't use phones, we use messages in bottles'... We have to*  
12 *adapt..." – GP 4*  
13  
14

---

15  
16 The platform utilized *existing communication technology* that was familiar to both staff and patients.  
17 Patients using the platform were perceived as being different from those seeking traditional care, with  
18 *fast response times expected by patients*, similar to a commercial customer support chat. Despite the  
19 challenges of adapting to the digital era, there was a general sense that the platform was *perceived*  
20 *better over time*.  
21  
22

---

23  
24 *"When it came we were a bit scared that it would be a lot... that we wouldn't be able*  
25 *to handle it, but today I feel that we are all pretty positive and that we more easily*  
26 *can communicate with patients and it will only get easier"*  
27 *– Nurse 7*  
28  
29

---

30  
31 In fact, all practices expressed *a desire to stay digital*, with two PHCCs incentivizing patients to use the  
32 platform by offering shorter waiting time for appointments or automatically redirecting certain patients  
33 from the phone.  
34  
35

### 36 **Safe and Secure for the Patient**

37  
38 The platform was perceived to contribute to *better sorting of patient queries* by giving an overview of  
39 incoming presenting symptoms and effective symptom reporting for triage to the adequate level of care.  
40 Reduced crowding was also perceived to *reduce infection risk*. There was a general perception of  
41 *improved access* to care as patients no longer needed to wait for staff to pick up the phone that led to a  
42 *feeling of security among patients*.  
43  
44

---

45  
46  
47 *"Many appreciate that hundred-percent availability which it really provides.*  
48 *[Patients] can write and will get through... that's very reassuring" – GP 2*  
49  
50

---

51  
52 Staff were also surprised that the platform was occasionally *used by unexpected patient groups*,  
53 including elderly individuals and patients with socioeconomic difficulties.  
54  
55  
56  
57  
58  
59

---

1  
2  
3  
4 *“It was a patient who otherwise has a very strained life. I was very surprised that she*  
5 *could use it, but it’s worked well for her... a single mother with three small children...*  
6 *working full time and finds phone calls from the practice difficult during working*  
7 *hours... So we can send her a text, or chat with her and manage things when it works*  
8 *for her... She thought it was great.” – GP 1*  
9

---

10  
11  
12 While the platform was initially viewed as a triage tool, it became increasingly clear to staff that  
13 *improved continuity mattered* most, giving PHCCs a unique advantage over private “digital only” family  
14 medicine providers. Following stable chronic conditions, SSRI treatments and dermatological diagnoses  
15 were some examples of platform use for improved continuity. *Frequent visitors were managed better*  
16 using the platform, with follow-ups via chat instead of physically. Staff were uncertain, however,  
17 whether the platform had substantially reduced physical visits in general.  
18  
19

---

20  
21 *“...I perceive that for my patients, mostly the sickest or most worried ones, it’s a huge*  
22 *reassurance and very personal. When they can chat with me and I can say like ‘We*  
23 *don’t need to book a new appointment’... ‘Take it easy and be in touch. It may take a*  
24 *day before I answer, but I will answer.’... then they have a face associated to the*  
25 *person writing... then one can sometimes even crack a joke in the chat” – GP 4*  
26  
27

---

### 28 29 30 **Doesn’t Suit Everyone and Everything**

31  
32 All PHCCs acknowledged that digital communication *doesn’t suit all patients*. Although some technically  
33 literate elderly patients used the platform, others were less confident often resulting in phone calls  
34 being made to clarify the issue. PHCC 2 mentioned that patients redirected to the platform via  
35 telephone could express dissatisfaction.  
36

37  
38 *Not all queries felt suitable for digital communication*, with unknown patients with mental illness being a  
39 common unsuitable situation, while simpler queries were more efficiently managed digitally.  
40

---

41  
42 *“Many queries are pretty simple... ‘I want to renew a prescription’, ‘what did my tests*  
43 *show?’, ‘why is there such a long waiting time’. In these situations, one isn’t*  
44 *dependent on any finessed nuances...” – GP 9*  
45  
46

---

47  
48 GPs envisioned *digital communication as a partial solution* to the challenges faced by family medicine,  
49 serving as an additional help to existing ways of working. Few queries were managed completely  
50 digitally, but rather “digi-physically” as digital communication could on many occasions contribute to  
51 overall management of a patient, followed by an occasional physical examination.  
52

### 53 54 **An Incomplete System**

1  
2  
3 Staff pointed out several *missing features and technical limitations* of using the platform, including lack  
4 of integration into the electronic medical record, integration with artificial intelligence for decision-  
5 support and automatic language translation.  
6

---

7  
8  
9 *“God, I can’t wait until one can use it in other languages. That would be completely*  
10 *amazing.” – Nurse 3*  
11

---

12  
13  
14 While the platform was somewhat flexible, further *adaption to local prerequisites* was desired. Staff,  
15 acknowledged, however, that optimal local adaptation probably only could be achieved if each PHCC  
16 developed their own platform.  
17

## 18 **DISCUSSION**

### 19 **Main Findings and Theme**

20  
21 The six categories were incorporated into the theme: *“Digital Communication: The Newcomer in Family*  
22 *Medicine”*. One might envision staff experience of working with digital communication to that of  
23 receiving a new son- or daughter-in-law, with the family representing the primary care system. Such a  
24 newcomer may be perceived to bring both risks and benefits to the family, while altering family  
25 dynamics. A son in-law, for example, may be perceived as safe and secure by one’s daughter (in this  
26 metaphor representing the patients). At the same time, the newcomer may not agree with everyone in  
27 the family, and both parties may need to develop new qualities to accept each other long-term.  
28  
29

30  
31 Staff perceived that digital communication offered many benefits, especially due to the asynchronous  
32 nature of the platform, but also needed to adapt to limitations in terms of use by inappropriate patient  
33 populations, information overload, and misinterpretation of text by both staff and patients.  
34  
35

### 36 **Strengths**

37  
38 Several factors add to the trustworthiness of our findings. Firstly, credibility increased by prolonged  
39 engagement, peer debriefing and triangulation. The two interviewers had experience with using digital  
40 communication in primary care, understanding the topic and optimally facilitating discussions; there was  
41 a mutual understanding of the context the participants worked with. Regular peer debriefing from  
42 coding to categorization added to study credibility. Investigator triangulation with a third researcher  
43 without a background in digital communication added an alternative perspective on the data for a richer  
44 interpretation. Data triangulation with non-verbal observations further added credibility. Highly  
45 engaged interview participants allowed for thorough descriptions of our goal phenomenon, adding  
46 transferability of our findings to similar contexts.  
47  
48

49  
50 Only one of our 43 subcategories emerged from the final interview, suggesting that “theoretical  
51 saturation” was reached.[15] However, we cannot exclude that further interviews would yield a  
52 different final perspective.  
53  
54

### 55 **Limitations**



1  
2  
3 Results should be interpreted with consideration to several limitations. Due to limited resources, we  
4 were unable to conduct secondary coding. We didn't conduct member checks which limits credibility.  
5 Lack of an audit trail also limits confirmability and consistency. Some participants tended to focus on the  
6 platform rather than our goal phenomenon. Finally, as interviewers were both GPs, participant  
7 engagement and interpretation of results may have been skewed in favor of GP over nurse perspectives.  
8  
9

## 10 **General Discussion**

11  
12 Our findings conceptualize digital communication as both an alternate means of information exchange  
13 (a transactional process) as well as a means of developing and maintaining doctor-patient relationships  
14 (a transformational process). This is in-line with the two dominating paradigms in the communication  
15 literature.[16] These perspectives must be interpreted in the existing social context where digital  
16 communication is increasingly used and expected. Additionally, implementing digital communication  
17 had effects beyond patient communication, i.e. on practice organization and working environment.  
18  
19

20  
21 The platform has recently been evaluated in a survey study finding that staff experienced improved  
22 triage, high patient satisfaction, issues of care supply to specific patient populations, and issues with  
23 managing IT-systems.[17] Our results add depth to these findings, as well as focusing primarily on staff  
24 experiences of digital communication beyond the platform itself.  
25

26  
27 Unlike Banks et. al[6] and Cowie et. al,[7] staff in this study didn't experience poor integration into  
28 clinical practice, and only nurses experienced a transient increase in workload before adapting to the  
29 new workflow. However, GPs in our study only received queries previously triaged by nurses, likely  
30 limiting consequences to GP workload. Findings in the study may be specific to the studied platform.  
31

## 32 **CONCLUSIONS**

33  
34 Family medicine staff experience a period of adjustment to integration of digital communication in a  
35 time when such communication is extensively used and expected by patients. Despite concerns about  
36 inappropriate use and difficulties interpreting text, digital communication has found a role as a useful  
37 means of communication, especially when combined with continuity of care. It seems that family  
38 medicine has a newcomer that is here to stay.  
39  
40

41 **Acknowledgements** We would like to thank the practice managers, general practitioners and nurses for  
42 sharing their valuable experiences.  
43

44 **Author Contributors** AE, VMN, SC and PM conceptualized the study. AE and VMN conducted data  
45 collection. AEN, VMN and BBB contributed to analysis of the results. All authors contributed to the  
46 preparation of the manuscript.  
47  
48

49 **Funding** This study was funded by the Thelma Zoéga fund and Region Skåne to Artin Entezarjou and  
50 funding from ALF, Region Skåne, to Susanna Calling. Funders had no role in data collection,  
51 interpretation or reporting.  
52

53 **Competing interests** None declared.  
54  
55  
56  
57  
58  
59  
60

## REFERENCES

1. Ekman B, Thulesius H, Wilkens J, et al. Utilization of digital primary care in Sweden: Descriptive analysis of claims data on demographics, socioeconomics, and diagnoses. *Int J Med Informatics* 2019;127:134-40. doi: <https://doi.org/10.1016/j.ijmedinf.2019.04.016>
2. McCartney M. Show us the evidence for telehealth. *BMJ (Clinical research ed)* 2012;344:e469. doi: 10.1136/bmj.e469
3. Organisation for Economic Co-operation and Development (OECD). Health at a Glance 2019: OECD Indicators. Paris. OECD Publishing 2019. doi: <https://doi.org/10.1787/4dd50c09-en> [published Online First: 2019/11/07]
4. Vårdanalys. Vården ur primärvårdsläkarnas perspektiv – en jämförelse mellan Sverige och nio andra länder [Healthcare from general practitioner perspectives – a comparison between Sweden and nine other countries]. 2015.
5. Fagerlund AJ, Holm IM, Zanaboni P. General practitioners' perceptions towards the use of digital health services for citizens in primary care: a qualitative interview study. *BMJ Open* 2019;9(5):e028251. doi: 10.1136/bmjopen-2018-028251 [published Online First: 2019/05/08]
6. Banks J, Farr M, Salisbury C, et al. Use of an electronic consultation system in primary care: a qualitative interview study. *The British journal of general practice : the journal of the Royal College of General Practitioners* 2018;68(666):e1-e8. doi: 10.3399/bjgp17X693509 [published Online First: 2017/11/08]
7. Cowie J, Calveley E, Bowers G, et al. Evaluation of a Digital Consultation and Self-Care Advice Tool in Primary Care: A Multi-Methods Study. *International journal of environmental research and public health* 2018;15(5) doi: 10.3390/ijerph15050896 [published Online First: 2018/05/05]
8. Laurant M, van der Biezen M, Wijers N, et al. Nurses as substitutes for doctors in primary care. *The Cochrane database of systematic reviews* 2018;7:CD001271. doi: 10.1002/14651858.CD001271.pub3 [published Online First: 2018/07/17]
9. Öberg U, Orre CJ, Isaksson U, et al. Swedish primary healthcare nurses' perceptions of using digital eHealth services in support of patient self-management. *Scandinavian journal of caring sciences* 2018;32(2):961-70. doi: 10.1111/scs.12534 [published Online First: 2017/09/28]
10. Larsen JH, Neighbour R. Five cards: a simple guide to beginning the consultation. *The British journal of general practice : the journal of the Royal College of General Practitioners* 2014;64(620):150-1. doi: 10.3399/bjgp14X677662
11. Creswell JW, Poth CN. Qualitative Inquiry and Research Design Choosing among Five Approaches. 4th ed: SAGE Publications, Inc.Thousand Oaks 2018.
12. Graneheim UH, Lundman B. Qualitative content analysis in nursing research: concepts, procedures and measures to achieve trustworthiness. *Nurse Educ Today* 2004;24(2):105-12. doi: 10.1016/j.nedt.2003.10.001 [published Online First: 2004/02/11]
13. Kitzinger J. Qualitative research. Introducing focus groups. *BMJ* 1995;311(7000):299-302. [published Online First: 1995/07/29]
14. O'Brien BC, Harris IB, Beckman TJ, et al. Standards for reporting qualitative research: a synthesis of recommendations. *Academic medicine : journal of the Association of American Medical Colleges* 2014;89(9):1245-51. doi: 10.1097/acm.0000000000000388 [published Online First: 2014/07/01]
15. Saunders B, Sim J, Kingstone T, et al. Saturation in qualitative research: exploring its conceptualization and operationalization. *Quality & quantity* 2018;52(4):1893-907. doi: 10.1007/s11135-017-0574-8 [published Online First: 2018/06/26]
16. Manojlovich M, Squires JE, Davies B, et al. Hiding in plain sight: communication theory in implementation science. *Implementation science : IS* 2015;10:58. doi: 10.1186/s13012-015-0244-y [published Online First: 2015/04/24]

1  
2  
3  
4  
5  
6  
7  
8  
9  
10  
11  
12  
13  
14  
15  
16  
17  
18  
19  
20  
21  
22  
23  
24  
25  
26  
27  
28  
29  
30  
31  
32  
33  
34  
35  
36  
37  
38  
39  
40  
41  
42  
43  
44  
45  
46  
47  
48  
49  
50  
51  
52  
53  
54  
55  
56  
57  
58  
59  
60

17. Johansson A, Ivarsson B. Nurse Telephone Counseling Services as a "Gatekeeper" in an Internet-Based Digital Doctor Reception: A Mixed Questionnaire Survey. *J Prim Care Community Health* 2019;10:2150132719886952. doi: 10.1177/2150132719886952 [published Online First: 2019/11/07]

For peer review only

## Appendix 1: Interview Guide

### Information to participants

Those of you who are present at this interview have worked with digital communication in [the platform]. The purpose of today's focus group interview is to explore your experiences with digital communication. I will ask a number of questions to open up for discussion, but you are free to speak about how you feel. No answer is right or wrong.

**(Questions below are asked in case discussions spontaneously end. Spontaneous participant thoughts are prioritized above answers to questions below)**

- Can you describe how things have worked with digital communication?
  - Examples regarding when it has worked well?
  - Examples regarding when it has not worked well?
- How did you react when you found out you would start working with digital communication?
- How was the process of starting with digital communication? How did you experience it?
- How has digital communication affected your way of working?
- What is good and bad about digital communication?
- Do you think one can improve digital communication in any way?
- Do you experience that digital communication has affected patient contact? In what way?
  - Examples regarding when it has worked well?
  - Examples regarding when it has not worked well?
- How do you perceive patients are affected by digital communication?
- How do you feel about the future of digital communication?
- How has your daily work been affected by digital communication?
  - Can you give examples where you think it's had a positive or negative effect?
- What medical consequences do you feel that digital communication has?  
(Examples if participants don't think of anything: influence on prescribing behavior, sick notes, psychiatric assessments, patient safety)
- What do you think about the report generated by the automated patient history software?
- How has digital communication affected your working environment?

# Reporting checklist for qualitative study.

Based on the SRQR guidelines.

## Instructions to authors

Complete this checklist by entering the page numbers from your manuscript where readers will find each of the items listed below.

Your article may not currently address all the items on the checklist. Please modify your text to include the missing information. If you are certain that an item does not apply, please write "n/a" and provide a short explanation.

Upload your completed checklist as an extra file when you submit to a journal.

In your methods section, say that you used the SRQR reporting guidelines, and cite them as:

O'Brien BC, Harris IB, Beckman TJ, Reed DA, Cook DA. Standards for reporting qualitative research: a synthesis of recommendations. *Acad Med.* 2014;89(9):1245-1251.

|                                            | Reporting Item                                                                                                                                                                                                                                          | Page Number |
|--------------------------------------------|---------------------------------------------------------------------------------------------------------------------------------------------------------------------------------------------------------------------------------------------------------|-------------|
|                                            | <a href="#">#1</a> Concise description of the nature and topic of the study identifying the study as qualitative or indicating the approach (e.g. ethnography, grounded theory) or data collection methods (e.g. interview, focus group) is recommended | <b>2</b>    |
|                                            | <a href="#">#2</a> Summary of the key elements of the study using the abstract format of the intended publication; typically includes background, purpose, methods, results and conclusions                                                             | <b>2</b>    |
| Problem formulation                        | <a href="#">#3</a> Description and significance of the problem / phenomenon studied: review of relevant theory and empirical work; problem statement                                                                                                    | <b>3</b>    |
| Purpose or research question               | <a href="#">#4</a> Purpose of the study and specific objectives or questions                                                                                                                                                                            | <b>3</b>    |
| Qualitative approach and research paradigm | <a href="#">#5</a> Qualitative approach (e.g. ethnography, grounded theory, case study, phenomenology, narrative research) and                                                                                                                          | <b>4</b>    |

guiding theory if appropriate; identifying the research paradigm (e.g. postpositivist, constructivist / interpretivist) is also recommended; rationale. The rationale should briefly discuss the justification for choosing that theory, approach, method or technique rather than other options available; the assumptions and limitations implicit in those choices and how those choices influence study conclusions and transferability. As appropriate the rationale for several items might be discussed together.

|    |                           |                                                                                                                                                                                                                                                                                                                                                      |    |
|----|---------------------------|------------------------------------------------------------------------------------------------------------------------------------------------------------------------------------------------------------------------------------------------------------------------------------------------------------------------------------------------------|----|
| 1  |                           |                                                                                                                                                                                                                                                                                                                                                      |    |
| 2  |                           |                                                                                                                                                                                                                                                                                                                                                      |    |
| 3  |                           |                                                                                                                                                                                                                                                                                                                                                      |    |
| 4  |                           |                                                                                                                                                                                                                                                                                                                                                      |    |
| 5  |                           |                                                                                                                                                                                                                                                                                                                                                      |    |
| 6  |                           |                                                                                                                                                                                                                                                                                                                                                      |    |
| 7  |                           |                                                                                                                                                                                                                                                                                                                                                      |    |
| 8  |                           |                                                                                                                                                                                                                                                                                                                                                      |    |
| 9  |                           |                                                                                                                                                                                                                                                                                                                                                      |    |
| 10 |                           |                                                                                                                                                                                                                                                                                                                                                      |    |
| 11 |                           |                                                                                                                                                                                                                                                                                                                                                      |    |
| 12 |                           |                                                                                                                                                                                                                                                                                                                                                      |    |
| 13 |                           |                                                                                                                                                                                                                                                                                                                                                      |    |
| 14 | Researcher                | <a href="#">#6</a>                                                                                                                                                                                                                                                                                                                                   | 14 |
| 15 | characteristics and       |                                                                                                                                                                                                                                                                                                                                                      |    |
| 16 | reflexivity               | Researchers' characteristics that may influence the research, including personal attributes, qualifications / experience, relationship with participants, assumptions and / or presuppositions; potential or actual interaction between researchers' characteristics and the research questions, approach, methods, results and / or transferability |    |
| 17 |                           |                                                                                                                                                                                                                                                                                                                                                      |    |
| 18 |                           |                                                                                                                                                                                                                                                                                                                                                      |    |
| 19 |                           |                                                                                                                                                                                                                                                                                                                                                      |    |
| 20 |                           |                                                                                                                                                                                                                                                                                                                                                      |    |
| 21 |                           |                                                                                                                                                                                                                                                                                                                                                      |    |
| 22 |                           |                                                                                                                                                                                                                                                                                                                                                      |    |
| 23 |                           |                                                                                                                                                                                                                                                                                                                                                      |    |
| 24 |                           |                                                                                                                                                                                                                                                                                                                                                      |    |
| 25 | Context                   | <a href="#">#7</a>                                                                                                                                                                                                                                                                                                                                   | 4  |
| 26 |                           | Setting / site and salient contextual factors; rationale                                                                                                                                                                                                                                                                                             |    |
| 27 |                           |                                                                                                                                                                                                                                                                                                                                                      |    |
| 28 | Sampling strategy         | <a href="#">#8</a>                                                                                                                                                                                                                                                                                                                                   | 4  |
| 29 |                           | How and why research participants, documents, or events were selected; criteria for deciding when no further sampling was necessary (e.g. sampling saturation); rationale                                                                                                                                                                            |    |
| 30 |                           |                                                                                                                                                                                                                                                                                                                                                      |    |
| 31 |                           |                                                                                                                                                                                                                                                                                                                                                      |    |
| 32 |                           |                                                                                                                                                                                                                                                                                                                                                      |    |
| 33 |                           |                                                                                                                                                                                                                                                                                                                                                      |    |
| 34 |                           |                                                                                                                                                                                                                                                                                                                                                      |    |
| 35 | Ethical issues pertaining | <a href="#">#9</a>                                                                                                                                                                                                                                                                                                                                   | 4  |
| 36 | to human subjects         | Documentation of approval by an appropriate ethics review board and participant consent, or explanation for lack thereof; other confidentiality and data security issues                                                                                                                                                                             |    |
| 37 |                           |                                                                                                                                                                                                                                                                                                                                                      |    |
| 38 |                           |                                                                                                                                                                                                                                                                                                                                                      |    |
| 39 |                           |                                                                                                                                                                                                                                                                                                                                                      |    |
| 40 | Data collection methods   | <a href="#">#10</a>                                                                                                                                                                                                                                                                                                                                  | 4  |
| 41 |                           | Types of data collected; details of data collection procedures including (as appropriate) start and stop dates of data collection and analysis, iterative process, triangulation of sources / methods, and modification of procedures in response to evolving study findings; rationale                                                              |    |
| 42 |                           |                                                                                                                                                                                                                                                                                                                                                      |    |
| 43 |                           |                                                                                                                                                                                                                                                                                                                                                      |    |
| 44 |                           |                                                                                                                                                                                                                                                                                                                                                      |    |
| 45 |                           |                                                                                                                                                                                                                                                                                                                                                      |    |
| 46 |                           |                                                                                                                                                                                                                                                                                                                                                      |    |
| 47 |                           |                                                                                                                                                                                                                                                                                                                                                      |    |
| 48 |                           |                                                                                                                                                                                                                                                                                                                                                      |    |
| 49 |                           |                                                                                                                                                                                                                                                                                                                                                      |    |
| 50 | Data collection           | <a href="#">#11</a>                                                                                                                                                                                                                                                                                                                                  | 4  |
| 51 | instruments and           | Description of instruments (e.g. interview guides, questionnaires) and devices (e.g. audio recorders) used for data collection; if / how the instruments(s) changed over the course of the study                                                                                                                                                     |    |
| 52 | technologies              |                                                                                                                                                                                                                                                                                                                                                      |    |
| 53 |                           |                                                                                                                                                                                                                                                                                                                                                      |    |
| 54 |                           |                                                                                                                                                                                                                                                                                                                                                      |    |
| 55 |                           |                                                                                                                                                                                                                                                                                                                                                      |    |
| 56 |                           |                                                                                                                                                                                                                                                                                                                                                      |    |
| 57 | Units of study            | <a href="#">#12</a>                                                                                                                                                                                                                                                                                                                                  | 5  |
| 58 |                           | Number and relevant characteristics of participants, documents, or events included in the study; level of                                                                                                                                                                                                                                            |    |
| 59 |                           |                                                                                                                                                                                                                                                                                                                                                      |    |
| 60 |                           |                                                                                                                                                                                                                                                                                                                                                      |    |

participation (could be reported in results)

|    |                              |                     |          |
|----|------------------------------|---------------------|----------|
| 1  |                              |                     |          |
| 2  |                              |                     |          |
| 3  | Data processing              | <a href="#">#13</a> | 4        |
| 4  |                              |                     |          |
| 5  |                              |                     |          |
| 6  |                              |                     |          |
| 7  |                              |                     |          |
| 8  |                              |                     |          |
| 9  | Data analysis                | <a href="#">#14</a> | 4-5      |
| 10 |                              |                     |          |
| 11 |                              |                     |          |
| 12 |                              |                     |          |
| 13 |                              |                     |          |
| 14 |                              |                     |          |
| 15 |                              |                     |          |
| 16 | Techniques to enhance        | <a href="#">#15</a> | 13       |
| 17 | trustworthiness              |                     |          |
| 18 |                              |                     |          |
| 19 |                              |                     |          |
| 20 |                              |                     |          |
| 21 | Syntheses and                | <a href="#">#16</a> | 5-13     |
| 22 | interpretation               |                     |          |
| 23 |                              |                     |          |
| 24 |                              |                     |          |
| 25 |                              |                     |          |
| 26 |                              |                     |          |
| 27 | Links to empirical data      | <a href="#">#17</a> | 3, 14    |
| 28 |                              |                     |          |
| 29 |                              |                     |          |
| 30 |                              |                     |          |
| 31 | Intergration with prior      | <a href="#">#18</a> | 2, 13-14 |
| 32 | work, implications,          |                     |          |
| 33 | transferability and          |                     |          |
| 34 | contribution(s) to the field |                     |          |
| 35 |                              |                     |          |
| 36 |                              |                     |          |
| 37 |                              |                     |          |
| 38 |                              |                     |          |
| 39 |                              |                     |          |
| 40 | Limitations                  | <a href="#">#19</a> | 13-14    |
| 41 |                              |                     |          |
| 42 |                              |                     |          |
| 43 | Conflicts of interest        | <a href="#">#20</a> | 14       |
| 44 |                              |                     |          |
| 45 |                              |                     |          |
| 46 |                              |                     |          |
| 47 |                              |                     |          |
| 48 | Funding                      | <a href="#">#21</a> | 14       |
| 49 |                              |                     |          |
| 50 |                              |                     |          |

The SRQR checklist is distributed with permission of Wolters Kluwer © 2014 by the Association of American Medical Colleges. This checklist can be completed online using <https://www.goodreports.org/>, a tool made by the [EQUATOR Network](#) in collaboration with [Penelope.ai](#)

# BMJ Open

## Experiences of digital communication with automated patient interviews and asynchronous chat in Swedish primary care - a qualitative study

|                                 |                                                                                                                                                                                                                                                                                                                                           |
|---------------------------------|-------------------------------------------------------------------------------------------------------------------------------------------------------------------------------------------------------------------------------------------------------------------------------------------------------------------------------------------|
| Journal:                        | <i>BMJ Open</i>                                                                                                                                                                                                                                                                                                                           |
| Manuscript ID                   | bmjopen-2019-036585.R1                                                                                                                                                                                                                                                                                                                    |
| Article Type:                   | Original research                                                                                                                                                                                                                                                                                                                         |
| Date Submitted by the Author:   | 27-Apr-2020                                                                                                                                                                                                                                                                                                                               |
| Complete List of Authors:       | Entezarjou, Artin; Lund University, Department of Clinical Sciences Malmö<br>Bolmsjö, Beata; Lund University, Department of Clinical Sciences in Malmö/Family Medicine<br>Calling, Susanna; Lunds Universitet,<br>Midlöv, Patrik ; Lund University, Clinical Sciences Malmö<br>Milos Nymberg, Veronica ; Lund University, Family Medicine |
| <b>Primary Subject Heading</b>: | General practice / Family practice                                                                                                                                                                                                                                                                                                        |
| Secondary Subject Heading:      | Qualitative research, Communication                                                                                                                                                                                                                                                                                                       |
| Keywords:                       | Telemedicine < BIOTECHNOLOGY & BIOINFORMATICS, PRIMARY CARE, Information technology < BIOTECHNOLOGY & BIOINFORMATICS, BIOTECHNOLOGY & BIOINFORMATICS, Organisation of health services < HEALTH SERVICES ADMINISTRATION & MANAGEMENT                                                                                                       |
|                                 |                                                                                                                                                                                                                                                                                                                                           |

SCHOLARONE™  
Manuscripts





I, the Submitting Author has the right to grant and does grant on behalf of all authors of the Work (as defined in the below author licence), an exclusive licence and/or a non-exclusive licence for contributions from authors who are: i) UK Crown employees; ii) where BMJ has agreed a CC-BY licence shall apply, and/or iii) in accordance with the terms applicable for US Federal Government officers or employees acting as part of their official duties; on a worldwide, perpetual, irrevocable, royalty-free basis to BMJ Publishing Group Ltd ("BMJ") its licensees and where the relevant Journal is co-owned by BMJ to the co-owners of the Journal, to publish the Work in this journal and any other BMJ products and to exploit all rights, as set out in our [licence](#).

The Submitting Author accepts and understands that any supply made under these terms is made by BMJ to the Submitting Author unless you are acting as an employee on behalf of your employer or a postgraduate student of an affiliated institution which is paying any applicable article publishing charge ("APC") for Open Access articles. Where the Submitting Author wishes to make the Work available on an Open Access basis (and intends to pay the relevant APC), the terms of reuse of such Open Access shall be governed by a Creative Commons licence – details of these licences and which [Creative Commons](#) licence will apply to this Work are set out in our licence referred to above.

Other than as permitted in any relevant BMJ Author's Self Archiving Policies, I confirm this Work has not been accepted for publication elsewhere, is not being considered for publication elsewhere and does not duplicate material already published. I confirm all authors consent to publication of this Work and authorise the granting of this licence.

1  
2  
3  
4  
5  
6  
7  
8  
9  
10  
11  
12  
13  
14  
15  
16  
17  
18  
19  
20  
21  
22  
23  
24  
25  
26  
27  
28  
29  
30  
31  
32  
33  
34  
35  
36  
37  
38  
39  
40  
41  
42  
43  
44  
45  
46  
47  
48  
49  
50  
51  
52  
53  
54  
55  
56  
57  
58  
59  
60

**Experiences of digital communication with  
automated patient interviews and asynchronous chat  
in Swedish primary care - a qualitative study**

5 Artin Entezarjou<sup>1</sup>, Beata Borgström Bolmsjö<sup>1</sup>, Susanna Calling<sup>1</sup>, Patrik Midlöv<sup>1</sup>, Veronica Milos Nymberg<sup>1</sup>  
6 Lund University, Department of Clinical Sciences in Malmö/Family Medicine, Center for Primary Health  
7 Care Research, Box 50332, 20213 Malmö, Sweden

8  
9  
10 **Corresponding author:**

11 Artin Entezarjou, [artin.entezarjou@med.lu.se](mailto:artin.entezarjou@med.lu.se), +46723013113  
12 Lund University  
13 Department of Clinical Sciences in Malmö/Family Medicine  
14 Center for Primary Health Care Research  
15 Box 50332  
16 202 13 Malmö  
17 Sweden

18  
19  
20 **Word count** excluding title page, abstract, tables, acknowledgements, contributions & references: 3926

21 **Key words:** Telemedicine, Primary Care, Information Technology, Medical Staff, Attitude of Health  
22 Personnel

## 24 ABSTRACT

25 **Objectives:** To explore staff experiences of working with a digital communication platform implemented  
26 throughout several primary health care centers in Sweden.

27 **Design:** A descriptive qualitative approach using focus group interviews. Qualitative content analysis was  
28 used to code, categorize, and thematize data.

29 **Setting:** Primary health care centers across Sweden, in both rural and urban settings.

30 **Participants:** A total of three mixed focus groups, comprising 19 general practitioners and nurses with  
31 experience using a specific digital communication platform.

32 **Results:** Five categories emerged: “Fears and Benefits of Digital Communication”, “Altered Practice  
33 Workflow”, “Accepting the Digital Society”, “Safe and Secure for Patients”, and “Doesn't Suit Everyone  
34 and Everything”. These were abstracted into two comprehensive themes: “Adjusting to a novel medium  
35 of communication” and “Digitally filtered primary care”, describing how staff experienced integrating  
36 the software as a useful tool for certain clinical contexts while managing communication challenges  
37 associated with written communication.

38 **Conclusions:** Family medicine staff were ambivalent concerning the use of digital communication but,  
39 after a period of adjustment, it was seen as a useful communication tool especially when combined with  
40 continuity of care. Staff acknowledged limitations regarding use by inappropriate patient populations,  
41 information overload and misinterpretation of text by both staff and patients.

42  
43 Abstract word count: 199  
44

## 45 STRENGTHS AND LIMITATIONS OF THIS STUDY

- 46 • This is the first focus group study describing both physicians' and nurses' experiences of two-  
47 way digital communication between patients and providers in primary care settings.
- 48 • Theoretical saturation and high participant engagement allowed for rich descriptions and  
49 transferability of our findings to other contexts.
- 50 • Limitations include lack of multiple coders and a potential bias toward physician perspectives as  
51 the interviewers were both physicians.

## 52 INTRODUCTION

53 The patient interview and physical examination are central to family medicine consultations. In Sweden,  
54 patients are increasingly using digital communication to access primary care.[1] Swedish health care  
55 holds a high international standard,[2] but low continuity and poor accessibility to primary care  
56 contribute to low patient satisfaction.[3] Whether digital communication can address or aggravate these  
57 challenges is currently unknown.[4] Furthermore, staffs' low technical literacy and resistance to change  
58 may be common barriers to implementation,[5] limiting potential benefits of such technology from  
59 being realized.

60 Heterogeneity between digital communication tools is high, making it difficult to draw general  
61 conclusions about their usefulness. Some use synchronous video communication, while others are  
62 asynchronous "chat-based". Different variations of automated patient interviewing software can also be  
63 used to gather key information prior to consultations.

64 The current study evaluates a digital communication platform (developed by Doctrin AB, referred to as  
65 'the platform' in this paper) implemented across several primary health care centers (PHCCs) in Sweden  
66 for use as an alternative point of access to primary care. Patients choose among a pre-specified list of  
67 queries and access an automated patient interviewing software on their computer, tablet or  
68 smartphone, freely writing their ideas, concerns, and expectations as is common in family medicine  
69 consultations.[6] They then answer a query-specific questionnaire, including the possibility to attach  
70 images, with answers presented to the healthcare provider (usually a nurse) who can proceed to  
71 communicate via asynchronous chat-based two-way communication. GPs or other staff can join the chat  
72 if required. If a query cannot be concluded via digital communication, the patient is scheduled for a  
73 relevant physical appointment.

74 A Norwegian study recently found that general practitioners (GPs) generally had positive experiences  
75 with using digital communication.[7] Meanwhile, UK studies found GPs felt such communication  
76 benefited patients and saved time, but also raised concerns about security, increased workloads, and  
77 poor integration into clinical practice.[8, 9]

78 None of the above studies evaluated two-way digital communication systems, where both patient and  
79 provider can send digital messages. Such communication has been studied in the context of specific  
80 diseases [10-12] or mobile phone text messaging without an adapted platform software.[13]

81 Furthermore, leveraging reports summarizing patient ideas, concerns, and expectations prior to digital  
82 communication may be important for staff to more effectively help patients without additional  
83 workloads.[8] Therefore this qualitative study aimed to answer the following research question:

84 *How do family medicine physicians and nurses experience the implementation and use of digital*  
85 *communication in the form of automated patient interviewing software and chat-based patient-provider*  
86 *communication?*

87

## 88 METHODS

### 89 **Qualitative Approach and Research Paradigm**

90 This study deemed an interpretivist paradigm suitable for understanding the phenomena of staff  
91 experience working with digital communication.[14] Focus group interviews, commonly used to study  
92 attitudes and needs of medical staff,[15] were thus chosen as the data-collection method. As the GPs  
93 and nurses form pre-existing groups working together as a team during the focus group interviews, it  
94 allows “naturalistic” exchanges during data collection. This may give a deeper understanding of the  
95 target phenomenon. Open discussions allow participants to debate the studied phenomenon from a  
96 personal point of view and facilitate expression of beliefs and attitudes left undeveloped in an individual  
97 deep interview.

### 98 **Context**

99 Three PHCCs were purposefully sampled from a wide range of national PHCCs using the platform.  
100 Samples were chosen to provide a mix of urban and rural settings, as well as smaller and larger panel  
101 sizes. In each sampled PHCC, all GPs and nurses with experience of using the platform were invited to  
102 participate, with the goal of recruiting a minimum of six participants per group with an even distribution  
103 of GPs and nurses.

### 104 **Ethical Considerations**

105 The study was approved by the Swedish Ethical Review Authority (reference number 2019-01516).  
106 Participants gave written consent to participate in the focus group interview.

### 107 **Patient and Public Involvement**

108 Patients or the public were not involved in this study.

### 109 **Data Availability Statement**

110 Interview transcripts and coding data is available upon request.

### 111 **Data Collection**

112 Interviews were conducted between June 5<sup>th</sup> and June 12<sup>th</sup> 2019 with a moderator (VMN) introducing  
113 topics with open-ended interview-guide questions (appendix 1), facilitating the discussion with follow-  
114 up questions and summaries to verify interpretations. The interview guide was iteratively modified in  
115 response to evolving study findings. For data triangulation, an interview assistant (AE) observed and  
116 registered non-verbal communication but also aided the moderator in facilitating the discussion.  
117 Demographic data and quantitative data on months of experience working with the platform were also  
118 collected from all interview participants with a short questionnaire. Interviews were audio recorded  
119 (Olympus VN-8700PC) and transcribed verbatim.

### 120 **Data Analysis**

121 Qualitative content analysis as presented by Graneheim and Lundman[16] was used as it is a suitable  
122 inductive approach for describing human experience while also allowing for triangulation of analysis by  
123 reserachers without contact with studied persons.[17] Analysis was conducted in Swedish with NVivo  
124 12. Relevant quotes were translated into English. The first author (AE) coded the dataset (examples  
125 given in table 1), with regular discussions with two other authors (VMN and BBB) at all levels of analysis.

126 All three authors were involved in thematization. The manuscript was drafted using SRQR reporting  
127 guidelines.[18]

128 *Table 1: Examples of meaning units, condensed meaning units and codes*

| Meaning unit                                                                                                              | Condensed Meaning Unit                             | Code                           |
|---------------------------------------------------------------------------------------------------------------------------|----------------------------------------------------|--------------------------------|
| "...if it has any medical consequences, it's too soon to tell, there's too few, a too small sample"                       | Too small sample to know medical consequences      | Medical consequences unknown   |
| "...and to be able to consult colleagues and the doctors and such... I see that as positive, compared to using the phone" | Easier to consult colleagues compared to the phone | Enables colleague consultation |

129

## 130 RESULTS

### 131 Study Unit Characteristics

132 Characteristics of PHCC participants and the interviews are summarized in table 2.

133 *Table 2: PHCC, staff, and interview characteristics.*

|        | Interview Duration (min) | Location | Patients managed | Number of Staff (as cited) | Age Group | Number of Females | Mean Years with License (range) | Mean Months in Platform (range) |
|--------|--------------------------|----------|------------------|----------------------------|-----------|-------------------|---------------------------------|---------------------------------|
| PHCC 1 | 49                       | Urban    | 9 000            | 3 Nurses (Nurse 1-3)       | 20-50     | 3                 | 4.3 (3-5)                       | 2.7 (2-3)                       |
|        |                          |          |                  | 1 GP (GP 1)                | 50-60     | 1                 | 18 (18-18)                      | 4 (4-4)                         |
| PHCC 2 | 43                       | Urban    | 27 000           | 2 Nurses (Nurse 4-5)       | 20-40     | 2                 | 6 (1-11)                        | 3 (3-3)                         |
|        |                          |          |                  | 3 GPs (GP 2-4)             | 40-50     | 1                 | 10 (9-11)                       | 4 (1-6)                         |
| PHCC 3 | 39                       | Rural    | 8 000            | 5 Nurses (Nurse 6-10)      | 30-60     | 4                 | 17.4 (1-31)                     | 3.5 (2-4)                       |
|        |                          |          |                  | 5 GPs (GP 5-9)             | 30-60     | 4                 | 15.2 (3-23)                     | 3.6 (3-4)                       |

134

135 During analysis, 14 subcategories emerged, grouped into five categories, abstracted into two themes:  
136 "Adjusting to a novel medium of communication" and "Digitally filtered primary care" (table 3). Below,  
137 each category is described in detail.

138 *Table 3: Themes, categories, and subcategories.*

| Theme          | Category         | Sub-Category              |
|----------------|------------------|---------------------------|
| Adjusting to a | Altered Practice | Streamlined communication |

|                                 |                                               |                                             |
|---------------------------------|-----------------------------------------------|---------------------------------------------|
| novel medium of communication   | Workflow                                      | Improved inter-disciplinary cooperation     |
|                                 |                                               | Unpredictable workload                      |
|                                 | Accepting the Digital Society                 | Expectations to be digital                  |
|                                 |                                               | Improved digital experience over time       |
| Safe and Secure for the Patient | Improved management of certain patient groups |                                             |
|                                 | Accessible continuity                         |                                             |
| Digitally filtered primary care | Doesn't Suit Everyone and Everything          | Not suitable for all patient queries        |
|                                 |                                               | Digital communication as a partial solution |
|                                 |                                               | An incomplete system                        |
|                                 | Fears and Benefits of Digital Communication   | Incomplete information transfer             |
|                                 |                                               | Ambivalence and uncertainty                 |
|                                 |                                               | Superhuman capacity                         |
|                                 |                                               | Affects the patient-provider relationship   |

139

### 140 Fears and Benefits of Digital Communication

141 Participants expressed an ambivalence towards the use of digital communication. Some felt curious and  
 142 excited, while others expressed skepticism to the usefulness of such technology. PHCC 1 and PHCC 3 had  
 143 relatively few patients using the platform, while PHCC 2 used the platform extensively. All participants  
 144 felt it was too early to evaluate long-term risks and consequences of its use.

145

146 Nurses from the two urban PHCCs felt that the platform allowed patients to fully express their concerns  
 147 without interruption, as some text presented by the automated patient interview was directly written  
 148 by the patient.

---

149 *"And it's really their words. It's not our interpretation of their words. That's also... it*  
 150 *becomes more certain, I think."* – Nurse 3

---

151 Staff perceived an advantage of using software to ensure that relevant questions were always asked,  
 152 without individual stress or other externalities affecting the consultation. The ability to reflect over  
 153 messages before sending them was perceived as beneficial, especially for emotionally loaded  
 154 discussions. On the contrary, staff highlighted that some patients experienced the chat as "robotic",  
 155 speculating that this could affect the patient-provider relationship.

156

157 Several participants mentioned that the automated patient interview allowed for acquisition of patient  
 158 history data beyond what would otherwise be feasible during a regular phone call. While the presented  
 159 information was perceived as useful, covering important differential diagnoses, staff felt overwhelmed  
 160 for clinical decision-making. There seemed to be a reluctance towards over-information, with GPs from  
 161 PHCC 2 concluding that the most valuable information came from the first three free-text questions  
 162 about patient ideas, concerns, and expectations.

---

163 *"...it's about having just enough information in those questionnaires so that one can*  
164 *digest it... there is a balance... between too much and too little information too, so*  
165 *that it stays relevant..." – GP 2*

---

166 The platform was perceived to provide a unique value through the asynchronous chat, as clinical  
167 decisions could be communicated with several short messages without excessive conversation. Sending  
168 images was perceived to be useful, providing a unique benefit over telephone consultations, especially  
169 for dermatological queries. The platform did not include synchronous video consultations at the time,  
170 but these were speculatively perceived as less beneficial, as they were thought to too similar to  
171 telephone consultations.

---

172 *"One aspect is the automated patient interview tool and the other is the*  
173 *asynchronous communication. So those two things are new... I almost think that the*  
174 *asynchronous communication is the biggest benefit. I do." – GP 4*

---

175  
176 All groups felt that communicating via text led to some loss of communication nuance. One GP  
177 repeatedly emphasized the shortcomings of written communication, giving the impression of being  
178 particularly cautious about widespread use of this new technology. While facial expressions and body  
179 language were already absent in telephone consultations, cues like tonality were further removed when  
180 moving to text-based communication. Staff felt that these cues, in certain situations, provided important  
181 "between the lines" context for interpretation of reported symptoms.

---

182 *"That's probably why... fully AI-run systems refer fifteen percent to the emergency*  
183 *department... Because if one interprets peoples' words literally, then the whole health*  
184 *care system crashes." – GP 4*

---

185 Patient interpretations of symptoms were perceived to not always be in-line with clinician  
186 interpretations. Misunderstood questions were not reformulated by the automated patient interview as  
187 would otherwise be possible in a live conversation.

---

188 *"What does 'dizziness' mean? ... There are many terms that mess things up. Because*  
189 *we're talking about different things, a certain symptom is one thing for the patient*  
190 *and another for me... so it's hard to just ask specific questions in a questionnaire like*  
191 *that." – GP 2*

---



1  
2  
3 192 Most often, staff experienced symptoms to be less severe than reported when asking follow-up  
4 193 questions. GPs feared trivializing patient symptoms over time. Such risks were perceived lower with  
5 194 telephone consultations where severity was more confidently assessed. Consequently, some GPs felt  
6 195 that they tended to ask more follow-up questions via the platform compared to telephone  
7 196 consultations.  
8  
9

---

11  
12 197 *“Yes, because I’m thinking if you look at the group presenting with anxiety and*  
13 198 *depression, for example, they get a lot of questions and then many of them*  
14 199 *specifically report suicidality or such, and... when one calls them, it isn’t at all like they*  
15 200 *have written.” – Nurse 4*  
16  
17

---

18  
19 201 The human ability to scrutinize reported information when consulting patients was deemed as central to  
20 202 the consultation process, but the automated patient interview was perceived to lack this ability.  
21  
22

---

23  
24 203 *“In a conversation... one consciously ignores some things... Here it’s ‘on print’... that*  
25 204 *they have ‘numbness in half of their body’... which looks a little worse than if they say*  
26 205 *it in a context where it is completely obvious that they don’t... The ‘human filter’, it*  
27 206 *vanishes.” – GP 4*  
28  
29

---

30  
31  
32 207 Staff also expressed frustrations over being involuntary responsible for irrelevant symptoms reported by  
33 208 the platform, including obsolete chronic symptoms or symptoms indicative of potentially severe disease.  
34  
35

---

36  
37 209 *“‘Do you have abdominal pain?’ Yes... they have had abdominal pain for fifty years.*  
38 210 *But we don’t need to talk about that today. I would never ask the question in a*  
39 211 *normal conversation... or an obvious tension headache, but... visual impairment,*  
40 212 *asymmetrical pupil size... like ‘Aha, maybe we should order an ambulance instead?!’”*  
41 213 *– GP 3*  
42  
43

---

44  
45 214 This resulted in divergent agendas between GPs and patients where GPs focused on addressing  
46 215 irrelevant but potentially urgent symptoms, while patients expect to get their primary less urgent  
47 216 concern addressed.  
48  
49

---

50  
51  
52 217 *“...it’s not the questions I want the answer to, but which I have to assess... and it’s*  
53 218 *extremely annoying... and now there’s also a pop-up... saying that I am responsible*  
54  
55  
56  
57  
58  
59  
60

1  
2  
3 219 *for all the information I'm getting... Then I feel [the platform] limits me... that it takes*  
4 220 *longer than if I had done it another way." – GP 3*  
5  
6  
7

---

8 221 Frustrations were also expressed regarding patients skipping questions, not reading staff responses,  
9 222 taking hours to answer follow-up questions, or failing to confirm suggested appointments.  
10  
11 223

#### 12 224 **Altered Practice Workflow**

13  
14 225 In all PHCCs, nurses initially managed most queries in the platform. Staff from PHCC 2 estimated that  
15 226 around 30% of queries were forwarded to GPs for further evaluation. Initially several nurses experienced  
16 227 stress of using the platform in addition to keeping track of electronic health records and other digital  
17 228 systems, as well as managing multiple parallel queries, especially when combined with physical visits  
18 229 and telephone consultations.  
19  
20  
21

---

22  
23 230 *"First it was a bit easy to make mistakes...if one had maybe five ongoing queries and*  
24 231 *maybe two girls around the same age or so to speak, it was easy to write to the*  
25 232 *wrong patient. [...] until one develops a routine." – Nurse 1*  
26  
27

---

28  
29 233 However, staff generally felt that they handled digital queries faster and better over time.  
30 234 Miscommunication prevention, adjusting staffing at other workstations, scheduling adjustments, and  
31 235 stress management strategies were examples of ongoing adjustments. The platform was then perceived  
32 236 as adding variation to the workday. There was a general sense that staff were content with the current  
33 237 state of affairs after a relatively hectic initial implementation of the new technology. Some PHCCs  
34 238 assigned rooms for work with the platform, with staff appreciating a less noisy environment.  
35  
36  
37

38 239  
39 240 All groups experienced shorter and more streamlined consultations, with easier appointment booking,  
40 241 information sharing, and expressed reluctance of no longer having to redial patients not answering their  
41 242 phones.  
42  
43 243  
44

---

45  
46 244 *"...visits are better prepared and that's both good and bad. For example... someone*  
47 245 *seeking care for mental illness, who has already filled in rating scales etc., one enters*  
48 246 *the conversation at a different point. It's not like, 'Good day, what are you here for?'.  
49 247 Instead you have a lot of information before, when one starts the conversation... if it*  
50 248 *has any medical consequences is too soon to tell..." – GP 9*  
51  
52  
53

---

54  
55 249  
56  
57  
58  
59  
60

1  
2  
3 250 Many felt that the chat-format made it easier to consult colleagues and gather information before  
4 251 answering certain patient queries, improving the inter-disciplinary collaboration and the perceived  
5 252 working environment.  
6 253

7 254 Challenges still remained, as staff expressed that certain patients took several hours to respond. By the  
8 255 end of the day, potentially urgent symptoms may thus have been left unaddressed. PHCC 3 managed  
9 256 this with a standardized message, informing patients to seek out-of-hours clinics for urgent symptoms.  
10 257

### 11 258 **Accepting the Digital Society**

12 259 There was a general perception that digitalization was not a choice. Parallels were drawn to  
13 260 implementation of telephone communication in family medicine, and pressures to use existing means of  
14 261 communication.  
15

---

16 262 *“... if you have an entire panel who speaks English, then it’s reasonable that we also*  
17 263 *speak English... we can’t close our eyes to the fact that people communicate this way.*  
18 264 *We can’t say ‘we don’t use phones, we use messages in bottles’... We have to*  
19 265 *adapt...” – GP 4*

---

20  
21  
22  
23  
24  
25  
26  
27  
28  
29 266 Patients using the platform were perceived as being different from those seeking traditional care, with  
30 267 patients expecting fast responses, similar to a commercial customer support chat. Despite the  
31 268 challenges of adapting to the digital era, there was a general sense that the platform was perceived  
32 269 better over time.  
33  
34  
35

---

36 270 *“When it came we were a bit scared that it would be a lot... that we wouldn’t be able*  
37 271 *to handle it, but today I feel that we are all pretty positive and that we more easily*  
38 272 *can communicate with patients and it will only get easier”*  
39 273 *– Nurse 7*

---

40  
41  
42  
43  
44 274 In fact, all practices expressed a desire to stay digital, with two PHCCs incentivizing patients to use the  
45 275 platform by offering shorter waiting time for appointments or automatically redirecting certain patients  
46 276 from the phone.  
47 277

### 48 278 **Safe and Secure for the Patient**

49  
50  
51 279 The platform was perceived to aid in triage by giving an overview of incoming presenting symptoms and  
52 280 reported symptoms. There was a general perception of improved access to care as staff felt that  
53 281 patients more quickly could engage in dialogue with nurses compared with telephone visits.  
54  
55  
56  
57  
58  
59  
60

---

282 *“Many appreciate that hundred-percent availability which it really provides.*  
283 *[Patients] can write and will get through... that’s very reassuring” – GP 2*

---

284 Staff were also surprised that the platform was occasionally used by elderly individuals and patients with  
285 socioeconomic difficulties.

---

286 *“It was a patient who otherwise has a very strained life. I was very surprised that she*  
287 *could use it, but it’s worked well for her... a single mother with three small children...*  
288 *working full time and finds phone calls from the practice difficult during working*  
289 *hours... So we can send her a text, or chat with her and manage things when it works*  
290 *for her... She thought it was great.” – GP 1*

---

291 PHCC 2 experienced a transition from initially viewing the platform as a triage tool to a tool for  
292 improving continuity of care, giving the PHCC a unique advantage over private “digital only” family  
293 medicine providers. One GP felt that his frequent visitors could be managed more effectively with chat  
294 follow-ups. Following stable chronic conditions, SSRI treatments and dermatological diagnoses were  
295 other examples of platform use for improved continuity. Staff were uncertain, however, whether the  
296 platform had substantially reduced physical visits in general.

---

297 *“...I perceive that for my patients, mostly the sickest or most worried ones, it’s a huge*  
298 *reassurance and very personal. When they can chat with me and I can say like ‘We*  
299 *don’t need to book a new appointment’... ‘Take it easy and be in touch. It may take a*  
300 *day before I answer, but I will answer.’... then they have a face associated to the*  
301 *person writing... then one can sometimes even crack a joke in the chat” – GP 4*

---

### 302 **Doesn’t Suit Everyone and Everything**

303 All groups acknowledged that digital communication didn’t suit all patient queries. Although some  
304 technically literate elderly patients used the platform, staff felt others were less confident often  
305 resulting in phone calls being made to clarify the issue. Staff generally felt the patients with simple  
306 queries were manageable in the platform, while complex queries or cases of low continuity were  
307 situations where the platform was perceived as less useful. In multiple instances, staff explained that  
308 queries which required prolonged dialogue via text often resulted in a phone call as this was perceived  
309 as a more effective way of managing and concluding such queries.

310 A number of technical improvements were lifted to adapt the platform to local prerequisites.

---

311 *“Many queries are pretty simple... ‘I want to renew a prescription’, ‘what did my tests*  
312 *show?’, ‘why is there such a long waiting time’. In these situations, one isn’t*  
313 *dependent on any finessed nuances...” – GP 9*

---

314 GPs envisioned digital communication as an additional tool to existing ways of working. Few queries  
315 were managed completely digitally, but rather “digi-physically” as digital communication could on many  
316 occasions contribute to overall management of a patient, followed by an occasional physical  
317 examination. Classification into digital or physical care was thus seen as a false dichotomy, as  
318 transitioning between modes of communication often was perceived as useful depending on the clinical  
319 situation.

320

## 321 **DISCUSSION**

### 322 **Main Findings**

323 PHCC staff initially experienced implementation of the platform as both uncertain and exciting. Over  
324 time, views of the platform seemed to shift from a foreign entity with a specific purpose to an  
325 integrated part of practice complementing other modes of patient communication. Challenges  
326 remained, but there was a general sense that staff wished to remain digital.

327

### 328 **Themes**

329 The theme “adjusting to a novel medium of communication” highlights how staff experienced having to  
330 accept and integrate asynchronous communication into practice, but also experiencing value in  
331 management of certain patients as well as improved continuity.

332 The theme “digitally filtered primary care” highlights that staff experienced patient data presented both  
333 in overwhelming detail in terms of symptom reports, but also with loss of communication nuances  
334 which created an uncertainty in the management of some patients.

335

### 336 **General Discussion**

337 Our findings conceptualize digital communication as both an alternate means of information exchange  
338 (a transactional process) as well as a means of developing and maintaining doctor-patient relationships  
339 (a transformational process), two dominating paradigms in the communication literature.[19]  
340 Additionally, implementing digital communication had effects beyond patient communication, i.e. on  
341 practice organization and working environment.

342 Qualitative research on primary care staff experiences of implementing automated patient interview  
343 software combined with two-way asynchronous digital communication is limited. Johansson and  
344 colleagues recently presented survey data on nurse experiences of a pilot version of the platform.[20]

1  
2  
3 345 Like our study, they found that nurses experienced improved triage, high patient satisfaction, issues of  
4 346 care supply to specific patient populations, and issues with managing IT-systems.[20] Our results add  
5 347 depth to these findings, as well as focusing primarily on staff experiences of digital communication  
6 348 beyond the platform itself.

7  
8  
9 349 In a separate publication, Johansson et al interviewed GPs after two months of using the same pilot  
10 350 platform.[21] Similar to our study, GPs expressed that the patients' self-reported medical history and  
11 351 asynchronous communication had a unique benefit, that visits were well prepared and that collegial  
12 352 collaboration increased. Furthermore, the GPs experienced that symptom severity was difficult to  
13 353 assess, that working with multiple IT-systems was cumbersome, and that not all queries were suitable.  
14 354 Our study adds staff experiences past two months of using the fully developed version of the platform,  
15 355 where staff express wishing to stay digital and further integrate the platform into practice.

16  
17  
18 356 Unlike our study, other studies have found that GPs experienced digital communication as poorly  
19 357 integrated into clinical practice, adding to increasing workloads.[8, 9] These were platforms were  
20 358 without two-way communication and patient-centered questionnaires, and queries weren't triaged by  
21 359 nurses prior to reaching GPs, indicating that our findings are context-specific.

22  
23  
24 360 Our findings are consistent with a Cochrane review concluding that health workers felt that two-way text  
25 361 based communication can facilitate the patient-provider relationship, but that specific situations still  
26 362 warrant face-to-face consultations.[13]

27  
28  
29 363 The finding that two-way digital communication focuses queries while letting patients better express  
30 364 their concerns is consistent with studies on nurses in the context of prostate cancer management.[10]

31  
32 365 The risk of misunderstandings given two-way written digital communication has also been expressed by  
33 366 clinicians in the context of managing diabetes[11] and young people with long term conditions.[12] The  
34 367 last study also concluded that digital communication is best implemented when there is an existing  
35 368 patient-provider relationship of trust.[12] Continuity of care thus remains a central component of a  
36 369 highly functioning primary care system.[22]

37  
38  
39 370

## 40 41 371 **Strengths**

42  
43 372 Several factors add to the trustworthiness of our findings. Firstly, credibility increased by prolonged  
44 373 engagement, peer debriefing and triangulation. The two interviewers had experience with using digital  
45 374 communication in primary care, creating a mutual understanding of the context the participants worked  
46 375 with. Peer debriefing from coding to categorization and data triangulation with non-verbal observations  
47 376 added credibility. Investigator triangulation with a third researcher without a background in digital  
48 377 communication added an alternative perspective on the data for a richer interpretation. Highly engaged  
49 378 participants allowed for thorough descriptions of our goal phenomenon, adding transferability of our  
50 379 findings to similar contexts. Purposefully sampled PHCCs from both rural and urban settings added  
51 380 generalizability to our findings.

52  
53  
54  
55  
56  
57  
58  
59  
60

1  
2  
3 381 No new subcategories emerged from the final focus group, suggesting that “theoretical saturation” was  
4 382 reached.[23] However, we cannot exclude that further focus groups would yield a different final  
5 383 perspective.  
6  
7

8 384

9 385 **Limitations**

10  
11 386 Due to limited resources, we were unable to conduct secondary coding. We didn’t conduct member  
12 387 checks which limits credibility. Lack of an audit trail also limits confirmability and consistency. This was a  
13 388 small study with three PHCCs and thus the experiences described may not represent those of most staff  
14 389 using the platform. The technology is new, and presumably currently adopted by PHCCs interested in  
15 390 using it.[24]  
16  
17

18 391 Mixing GPs and nurses may have influenced the results as GPs in some focus groups were perceived to  
19 392 answer more readily than nurses. However, mixing groups also allowed for instant exploration of  
20 393 experiences shared by both professions. Finally, as interviewers were both GPs, participant engagement  
21 394 and interpretation of results may have been skewed in favor of GP over nurse perspectives.  
22  
23

24 395

25  
26 396 **CONCLUSIONS**

27  
28 397 Family medicine staff experience a period of adjustment to integration of digital communication in a  
29 398 time when such communication is extensively used and expected by patients. Despite concerns about  
30 399 inappropriate use and difficulties interpreting text, staff experience digital communication as a  
31 400 potentially useful choice of communication in certain contexts, especially when combined with  
32 401 continuity of care. Future research should explore which specific clinical contexts are best suited for  
33 402 digital communication.  
34  
35

36  
37 403 **Acknowledgements** We would like to thank the practice managers, general practitioners and nurses for  
38 404 sharing their valuable experiences.  
39

40 405 **Author Contributors** AE, VMN, SC and PM conceptualized the study. AE and VMN conducted data  
41 406 collection. AEN, VMN and BBB contributed to analysis of the results. All authors contributed to the  
42 407 preparation of the manuscript.  
43

44 408 **Funding** This study was funded by the Thelma Zoéga fund and Region Skåne to Artin Entezarjou and  
45 409 funding from ALF, Region Skåne, to Susanna Calling. Funders had no role in data collection,  
46 410 interpretation or reporting.  
47  
48

49 411 **Competing interests** None declared.  
50  
51  
52  
53  
54  
55  
56  
57  
58  
59  
60

412 **References**

- 413 1. Ekman B, Thulesius H, Wilkens J, et al. Utilization of digital primary care in Sweden: Descriptive  
414 analysis of claims data on demographics, socioeconomic, and diagnoses. *Int J Med Informatics*  
415 2019;127:134-40. doi: <https://doi.org/10.1016/j.ijmedinf.2019.04.016>
- 416 2. Organisation for Economic Co-operation and Development (OECD). Health at a Glance 2019: OECD  
417 Indicators. Paris. OECD Publishing 2019. doi: <https://doi.org/10.1787/4dd50c09-en> [published  
418 Online First: 2019/11/07]
- 419 3. Vårdanalys. Vården ur primärvårdsläkarnas perspektiv – en jämförelse mellan Sverige och nio andra  
420 länder [Healthcare from general practitioner perspectives – a comparison between Sweden  
421 and nine other countries]. 2015.
- 422 4. Atherton H. Digitally enabled primary care: the emperor's new clothes? *British Journal of General*  
423 *Practice* 2019;69(686):420. doi: 10.3399/bjgp19X705125
- 424 5. Scott Kruse C, Karem P, Shifflett K, et al. Evaluating barriers to adopting telemedicine worldwide: A  
425 systematic review. *J Telemed Telecare* 2018;24(1):4-12. doi: 10.1177/1357633x16674087  
426 [published Online First: 2018/01/13]
- 427 6. Larsen JH, Neighbour R. Five cards: a simple guide to beginning the consultation. *The British journal of*  
428 *general practice : the journal of the Royal College of General Practitioners* 2014;64(620):150-1.  
429 doi: 10.3399/bjgp14X677662
- 430 7. Fagerlund AJ, Holm IM, Zanaboni P. General practitioners' perceptions towards the use of digital  
431 health services for citizens in primary care: a qualitative interview study. *BMJ Open*  
432 2019;9(5):e028251. doi: 10.1136/bmjopen-2018-028251 [published Online First: 2019/05/08]
- 433 8. Banks J, Farr M, Salisbury C, et al. Use of an electronic consultation system in primary care: a  
434 qualitative interview study. *The British journal of general practice : the journal of the Royal*  
435 *College of General Practitioners* 2018;68(666):e1-e8. doi: 10.3399/bjgp17X693509 [published  
436 Online First: 2017/11/08]
- 437 9. Cowie J, Calveley E, Bowers G, et al. Evaluation of a Digital Consultation and Self-Care Advice Tool in  
438 Primary Care: A Multi-Methods Study. *International journal of environmental research and*  
439 *public health* 2018;15(5) doi: 10.3390/ijerph15050896 [published Online First: 2018/05/05]
- 440 10. Clarke AL, Roscoe J, Appleton R, et al. "My gut feeling is we could do more..." a qualitative study  
441 exploring staff and patient perspectives before and after the implementation of an online  
442 prostate cancer-specific holistic needs assessment. *BMC health services research*  
443 2019;19(1):115. doi: 10.1186/s12913-019-3941-4 [published Online First: 2019/02/14]
- 444 11. Lie SS, Karlsen B, Graue M, et al. The influence of an eHealth intervention for adults with type 2  
445 diabetes on the patient-nurse relationship: a qualitative study. *Scandinavian journal of caring*  
446 *sciences* 2019;33(3):741-49. doi: 10.1111/scs.12671 [published Online First: 2019/03/14]
- 447 12. Griffiths F, Bryce C, Cave J, et al. Timely Digital Patient-Clinician Communication in Specialist Clinical  
448 Services for Young People: A Mixed-Methods Study (The LYNC Study). *Journal of medical*  
449 *Internet research* 2017;19(4):e102. doi: 10.2196/jmir.7154 [published Online First: 2017/04/12]
- 450 13. Odendaal WA, Anstey Watkins J, Leon N, et al. Health workers' perceptions and experiences of using  
451 mHealth technologies to deliver primary healthcare services: a qualitative evidence synthesis.  
452 *The Cochrane database of systematic reviews* 2020;3(3):Cd011942. doi:  
453 10.1002/14651858.CD011942.pub2 [published Online First: 2020/03/28]
- 454 14. Creswell JW, Poth CN. Qualitative Inquiry and Research Design Choosing among Five Approaches.  
455 4th ed: SAGE Publications, Inc.Thousand Oaks 2018.
- 456 15. Kitzinger J. Qualitative research. Introducing focus groups. *BMJ (Clinical research ed)*  
457 1995;311(7000):299-302. doi: 10.1136/bmj.311.7000.299 [published Online First: 1995/07/29]



- 1  
2  
3 458 16. Graneheim UH, Lundman B. Qualitative content analysis in nursing research: concepts, procedures  
4 459 and measures to achieve trustworthiness. *Nurse Educ Today* 2004;24(2):105-12. doi:  
5 460 10.1016/j.nedt.2003.10.001 [published Online First: 2004/02/11]  
6 461 17. Graneheim UH, Lindgren BM, Lundman B. Methodological challenges in qualitative content analysis:  
7 462 A discussion paper. *Nurse Educ Today* 2017;56:29-34. doi: 10.1016/j.nedt.2017.06.002  
8 463 [published Online First: 2017/06/27]  
9 464 18. O'Brien BC, Harris IB, Beckman TJ, et al. Standards for reporting qualitative research: a synthesis of  
10 465 recommendations. *Academic medicine : journal of the Association of American Medical Colleges*  
11 466 2014;89(9):1245-51. doi: 10.1097/acm.0000000000000388 [published Online First: 2014/07/01]  
12 467 19. Manojlovich M, Squires JE, Davies B, et al. Hiding in plain sight: communication theory in  
13 468 implementation science. *Implementation science : IS* 2015;10:58. doi: 10.1186/s13012-015-  
14 469 0244-y [published Online First: 2015/04/24]  
15 470 20. Johansson A, Ivarsson B. Nurse Telephone Counseling Services as a "Gatekeeper" in an Internet-  
16 471 Based Digital Doctor Reception: A Mixed Questionnaire Survey. *J Prim Care Community Health*  
17 472 2019;10:2150132719886952. doi: 10.1177/2150132719886952 [published Online First:  
18 473 2019/11/07]  
19 474 21. Johansson A, Larsson M, Ivarsson B. General Practitioners' Experiences of Digital Written Patient  
20 475 Dialogues: A Pilot Study Using a Mixed Method. *J Prim Care Community Health*  
21 476 2020;11:2150132720909656. doi: 10.1177/2150132720909656 [published Online First:  
22 477 2020/03/07]  
23 478 22. Pereira Gray DJ, Sidaway-Lee K, White E, et al. Continuity of care with doctors-a matter of life and  
24 479 death? A systematic review of continuity of care and mortality. *BMJ Open* 2018;8(6):e021161.  
25 480 doi: 10.1136/bmjopen-2017-021161 [published Online First: 2018/07/01]  
26 481 23. Saunders B, Sim J, Kingstone T, et al. Saturation in qualitative research: exploring its  
27 482 conceptualization and operationalization. *Quality & quantity* 2018;52(4):1893-907. doi:  
28 483 10.1007/s11135-017-0574-8 [published Online First: 2018/06/26]  
29 484 24. Rogers EM. Lessons for guidelines from the diffusion of innovations. *The Joint Commission journal on*  
30 485 *quality improvement* 1995;21(7):324-8. [published Online First: 1995/07/01]  
31  
32  
33  
34  
35  
36  
37  
38  
39  
40  
41  
42  
43  
44  
45  
46  
47  
48  
49  
50  
51  
52  
53  
54  
55  
56  
57  
58  
59  
60

## Appendix 1: Interview Guide

### Information to participants

Those of you who are present at this interview have worked with digital communication in [the platform]. The purpose of today's focus group interview is to explore your experiences with digital communication. I will ask a number of questions to open up for discussion, but you are free to speak about how you feel. No answer is right or wrong.

**(Questions below are asked in case discussions spontaneously end. Spontaneous participant thoughts are prioritized above answers to questions below)**

- Can you describe how things have worked with digital communication?
  - Examples regarding when it has worked well?
  - Examples regarding when it has not worked well?
- How did you react when you found out you would start working with digital communication?
- How was the process of starting with digital communication? How did you experience it?
- How has digital communication affected your way of working?
- What is good and bad about digital communication?
- Do you think one can improve digital communication in any way?
- Do you experience that digital communication has affected patient contact? In what way?
  - Examples regarding when it has worked well?
  - Examples regarding when it has not worked well?
- How do you perceive patients are affected by digital communication?
- How do you feel about the future of digital communication?
- How has your daily work been affected by digital communication?
  - Can you give examples where you think it's had a positive or negative effect?
- What medical consequences do you feel that digital communication has?  
(Examples if participants don't think of anything: influence on prescribing behavior, sick notes, psychiatric assessments, patient safety)
- What do you think about the report generated by the automated patient history software?
- How has digital communication affected your working environment?

# Reporting checklist for qualitative study.

Based on the SRQR guidelines.

## Instructions to authors

Complete this checklist by entering the page numbers from your manuscript where readers will find each of the items listed below.

Your article may not currently address all the items on the checklist. Please modify your text to include the missing information. If you are certain that an item does not apply, please write "n/a" and provide a short explanation.

Upload your completed checklist as an extra file when you submit to a journal.

In your methods section, say that you used the SRQR reporting guidelines, and cite them as:

O'Brien BC, Harris IB, Beckman TJ, Reed DA, Cook DA. Standards for reporting qualitative research: a synthesis of recommendations. *Acad Med.* 2014;89(9):1245-1251.

|                                            | Reporting Item                                                                                                                                                                                                                                          | Page Number |
|--------------------------------------------|---------------------------------------------------------------------------------------------------------------------------------------------------------------------------------------------------------------------------------------------------------|-------------|
|                                            | <a href="#">#1</a> Concise description of the nature and topic of the study identifying the study as qualitative or indicating the approach (e.g. ethnography, grounded theory) or data collection methods (e.g. interview, focus group) is recommended | <b>2</b>    |
|                                            | <a href="#">#2</a> Summary of the key elements of the study using the abstract format of the intended publication; typically includes background, purpose, methods, results and conclusions                                                             | <b>2</b>    |
| Problem formulation                        | <a href="#">#3</a> Description and significance of the problem / phenomenon studied: review of relevant theory and empirical work; problem statement                                                                                                    | <b>3</b>    |
| Purpose or research question               | <a href="#">#4</a> Purpose of the study and specific objectives or questions                                                                                                                                                                            | <b>3</b>    |
| Qualitative approach and research paradigm | <a href="#">#5</a> Qualitative approach (e.g. ethnography, grounded theory, case study, phenomenology, narrative research) and                                                                                                                          | <b>4</b>    |

guiding theory if appropriate; identifying the research paradigm (e.g. postpositivist, constructivist / interpretivist) is also recommended; rationale. The rationale should briefly discuss the justification for choosing that theory, approach, method or technique rather than other options available; the assumptions and limitations implicit in those choices and how those choices influence study conclusions and transferability. As appropriate the rationale for several items might be discussed together.

|    |                           |                                                                                                                                                                                                                                                                                                                                                      |    |
|----|---------------------------|------------------------------------------------------------------------------------------------------------------------------------------------------------------------------------------------------------------------------------------------------------------------------------------------------------------------------------------------------|----|
| 1  |                           |                                                                                                                                                                                                                                                                                                                                                      |    |
| 2  |                           |                                                                                                                                                                                                                                                                                                                                                      |    |
| 3  |                           |                                                                                                                                                                                                                                                                                                                                                      |    |
| 4  |                           |                                                                                                                                                                                                                                                                                                                                                      |    |
| 5  |                           |                                                                                                                                                                                                                                                                                                                                                      |    |
| 6  |                           |                                                                                                                                                                                                                                                                                                                                                      |    |
| 7  |                           |                                                                                                                                                                                                                                                                                                                                                      |    |
| 8  |                           |                                                                                                                                                                                                                                                                                                                                                      |    |
| 9  |                           |                                                                                                                                                                                                                                                                                                                                                      |    |
| 10 |                           |                                                                                                                                                                                                                                                                                                                                                      |    |
| 11 |                           |                                                                                                                                                                                                                                                                                                                                                      |    |
| 12 |                           |                                                                                                                                                                                                                                                                                                                                                      |    |
| 13 |                           |                                                                                                                                                                                                                                                                                                                                                      |    |
| 14 | Researcher                | <a href="#">#6</a>                                                                                                                                                                                                                                                                                                                                   | 14 |
| 15 | characteristics and       |                                                                                                                                                                                                                                                                                                                                                      |    |
| 16 | reflexivity               | Researchers' characteristics that may influence the research, including personal attributes, qualifications / experience, relationship with participants, assumptions and / or presuppositions; potential or actual interaction between researchers' characteristics and the research questions, approach, methods, results and / or transferability |    |
| 17 |                           |                                                                                                                                                                                                                                                                                                                                                      |    |
| 18 |                           |                                                                                                                                                                                                                                                                                                                                                      |    |
| 19 |                           |                                                                                                                                                                                                                                                                                                                                                      |    |
| 20 |                           |                                                                                                                                                                                                                                                                                                                                                      |    |
| 21 |                           |                                                                                                                                                                                                                                                                                                                                                      |    |
| 22 |                           |                                                                                                                                                                                                                                                                                                                                                      |    |
| 23 |                           |                                                                                                                                                                                                                                                                                                                                                      |    |
| 24 |                           |                                                                                                                                                                                                                                                                                                                                                      |    |
| 25 | Context                   | <a href="#">#7</a>                                                                                                                                                                                                                                                                                                                                   | 4  |
| 26 |                           | Setting / site and salient contextual factors; rationale                                                                                                                                                                                                                                                                                             |    |
| 27 |                           |                                                                                                                                                                                                                                                                                                                                                      |    |
| 28 | Sampling strategy         | <a href="#">#8</a>                                                                                                                                                                                                                                                                                                                                   | 4  |
| 29 |                           | How and why research participants, documents, or events were selected; criteria for deciding when no further sampling was necessary (e.g. sampling saturation); rationale                                                                                                                                                                            |    |
| 30 |                           |                                                                                                                                                                                                                                                                                                                                                      |    |
| 31 |                           |                                                                                                                                                                                                                                                                                                                                                      |    |
| 32 |                           |                                                                                                                                                                                                                                                                                                                                                      |    |
| 33 |                           |                                                                                                                                                                                                                                                                                                                                                      |    |
| 34 |                           |                                                                                                                                                                                                                                                                                                                                                      |    |
| 35 | Ethical issues pertaining | <a href="#">#9</a>                                                                                                                                                                                                                                                                                                                                   | 4  |
| 36 | to human subjects         | Documentation of approval by an appropriate ethics review board and participant consent, or explanation for lack thereof; other confidentiality and data security issues                                                                                                                                                                             |    |
| 37 |                           |                                                                                                                                                                                                                                                                                                                                                      |    |
| 38 |                           |                                                                                                                                                                                                                                                                                                                                                      |    |
| 39 |                           |                                                                                                                                                                                                                                                                                                                                                      |    |
| 40 | Data collection methods   | <a href="#">#10</a>                                                                                                                                                                                                                                                                                                                                  | 4  |
| 41 |                           | Types of data collected; details of data collection procedures including (as appropriate) start and stop dates of data collection and analysis, iterative process, triangulation of sources / methods, and modification of procedures in response to evolving study findings; rationale                                                              |    |
| 42 |                           |                                                                                                                                                                                                                                                                                                                                                      |    |
| 43 |                           |                                                                                                                                                                                                                                                                                                                                                      |    |
| 44 |                           |                                                                                                                                                                                                                                                                                                                                                      |    |
| 45 |                           |                                                                                                                                                                                                                                                                                                                                                      |    |
| 46 |                           |                                                                                                                                                                                                                                                                                                                                                      |    |
| 47 |                           |                                                                                                                                                                                                                                                                                                                                                      |    |
| 48 |                           |                                                                                                                                                                                                                                                                                                                                                      |    |
| 49 |                           |                                                                                                                                                                                                                                                                                                                                                      |    |
| 50 | Data collection           | <a href="#">#11</a>                                                                                                                                                                                                                                                                                                                                  | 4  |
| 51 | instruments and           | Description of instruments (e.g. interview guides, questionnaires) and devices (e.g. audio recorders) used for data collection; if / how the instruments(s) changed over the course of the study                                                                                                                                                     |    |
| 52 | technologies              |                                                                                                                                                                                                                                                                                                                                                      |    |
| 53 |                           |                                                                                                                                                                                                                                                                                                                                                      |    |
| 54 |                           |                                                                                                                                                                                                                                                                                                                                                      |    |
| 55 |                           |                                                                                                                                                                                                                                                                                                                                                      |    |
| 56 |                           |                                                                                                                                                                                                                                                                                                                                                      |    |
| 57 | Units of study            | <a href="#">#12</a>                                                                                                                                                                                                                                                                                                                                  | 5  |
| 58 |                           | Number and relevant characteristics of participants, documents, or events included in the study; level of                                                                                                                                                                                                                                            |    |
| 59 |                           |                                                                                                                                                                                                                                                                                                                                                      |    |
| 60 |                           |                                                                                                                                                                                                                                                                                                                                                      |    |

participation (could be reported in results)

|    |                              |                     |                                                                      |
|----|------------------------------|---------------------|----------------------------------------------------------------------|
| 1  |                              |                     |                                                                      |
| 2  |                              |                     |                                                                      |
| 3  | Data processing              | <a href="#">#13</a> | Methods for processing data prior to and during analysis, <b>4</b>   |
| 4  |                              |                     | including transcription, data entry, data management and             |
| 5  |                              |                     | security, verification of data integrity, data coding, and           |
| 6  |                              |                     | anonymisation / deidentification of excerpts                         |
| 7  |                              |                     |                                                                      |
| 8  |                              |                     |                                                                      |
| 9  | Data analysis                | <a href="#">#14</a> | Process by which inferences, themes, etc. were identified <b>4-5</b> |
| 10 |                              |                     | and developed, including the researchers involved in                 |
| 11 |                              |                     | data analysis; usually references a specific paradigm or             |
| 12 |                              |                     | approach; rationale                                                  |
| 13 |                              |                     |                                                                      |
| 14 |                              |                     |                                                                      |
| 15 |                              |                     |                                                                      |
| 16 | Techniques to enhance        | <a href="#">#15</a> | Techniques to enhance trustworthiness and credibility of <b>13</b>   |
| 17 | trustworthiness              |                     | data analysis (e.g. member checking, audit trail,                    |
| 18 |                              |                     | triangulation); rationale                                            |
| 19 |                              |                     |                                                                      |
| 20 |                              |                     |                                                                      |
| 21 | Syntheses and                | <a href="#">#16</a> | Main findings (e.g. interpretations, inferences, and <b>5-13</b>     |
| 22 | interpretation               |                     | themes); might include development of a theory or                    |
| 23 |                              |                     | model, or integration with prior research or theory                  |
| 24 |                              |                     |                                                                      |
| 25 |                              |                     |                                                                      |
| 26 | Links to empirical data      | <a href="#">#17</a> | Evidence (e.g. quotes, field notes, text excerpts, <b>3, 14</b>      |
| 27 |                              |                     | photographs) to substantiate analytic findings                       |
| 28 |                              |                     |                                                                      |
| 29 |                              |                     |                                                                      |
| 30 | Intergration with prior      | <a href="#">#18</a> | Short summary of main findings; explanation of how <b>2, 13-14</b>   |
| 31 | work, implications,          |                     | findings and conclusions connect to, support, elaborate              |
| 32 | transferability and          |                     | on, or challenge conclusions of earlier scholarship;                 |
| 33 | contribution(s) to the field |                     | discussion of scope of application / generalizability;               |
| 34 |                              |                     | identification of unique contributions(s) to scholarship in a        |
| 35 |                              |                     | discipline or field                                                  |
| 36 |                              |                     |                                                                      |
| 37 |                              |                     |                                                                      |
| 38 |                              |                     |                                                                      |
| 39 |                              |                     |                                                                      |
| 40 | Limitations                  | <a href="#">#19</a> | Trustworthiness and limitations of findings <b>13-14</b>             |
| 41 |                              |                     |                                                                      |
| 42 | Conflicts of interest        | <a href="#">#20</a> | Potential sources of influence of perceived influence on <b>14</b>   |
| 43 |                              |                     | study conduct and conclusions; how these were                        |
| 44 |                              |                     | managed                                                              |
| 45 |                              |                     |                                                                      |
| 46 |                              |                     |                                                                      |
| 47 |                              |                     |                                                                      |
| 48 | Funding                      | <a href="#">#21</a> | Sources of funding and other support; role of funders in <b>14</b>   |
| 49 |                              |                     | data collection, interpretation and reporting                        |
| 50 |                              |                     |                                                                      |
| 51 |                              |                     |                                                                      |

The SRQR checklist is distributed with permission of Wolters Kluwer © 2014 by the Association of American Medical Colleges. This checklist can be completed online using <https://www.goodreports.org/>, a tool made by the [EQUATOR Network](#) in collaboration with [Penelope.ai](#)
